# Supplementary material for: A complete series of N-heterocyclic tetrylenes (Si–Pb) with a 1,1′-ferrocenediyl backbone enabled by 1,3,2-diazaborolyl N-substituents
Source: Royal Society of Chemistry journal article supplement (doi:10.1039/d3dt02684a), 2023-01-01
Supplement: d3dt02684a1.pdf [file d3dt02684a1.pdf]

**A complete series of N-heterocyclic tetrylenes (Si – Pb) with a 1,1'-ferrocenediyl backbone enabled by 1,3,2-diazaborolyl N-substituents<sup>†</sup>**

Robin Guthardt,\* Hannes L. Jacob, Clemens Bruhn and Ulrich Siemeling\*

*Institute of Chemistry, University of Kassel, Heinrich-Plett-Str. 40, 34132 Kassel, Germany.  
E-mail: guthardt@uni-kassel.de, siemeling@uni-kassel.de*

|                                                    |     |
|----------------------------------------------------|-----|
| A – Experimental Section                           | S2  |
| Crystallographic data                              | S2  |
| Plots of NMR spectra                               | S3  |
| B – Computational Details                          | S15 |
| Frontier orbital discussion                        | S15 |
| Cartesian coordinates for the optimized structures | S20 |
| C – References                                     | S25 |

## A – Experimental Section

### Crystallographic data

**Table S1.** X-ray crystallographic details.

|                                             | 1H <sub>2</sub>                                                  | [1Li <sub>2</sub> (TMEDA) <sub>2</sub> ]·1.5 C <sub>6</sub> H <sub>6</sub>        | 1Si·C <sub>6</sub> H <sub>6</sub>                                  | 1Ge                                                               | 1Sn                                                                | 1Pb                                                                | 1Si(OH)H                                                            |
|---------------------------------------------|------------------------------------------------------------------|-----------------------------------------------------------------------------------|--------------------------------------------------------------------|-------------------------------------------------------------------|--------------------------------------------------------------------|--------------------------------------------------------------------|---------------------------------------------------------------------|
| Empirical formula                           | C <sub>62</sub> H <sub>82</sub> B <sub>2</sub> FeN <sub>6</sub>  | C <sub>83</sub> H <sub>121</sub> B <sub>2</sub> FeLi <sub>2</sub> N <sub>10</sub> | C <sub>68</sub> H <sub>86</sub> B <sub>2</sub> FeN <sub>6</sub> Si | C <sub>62</sub> H <sub>80</sub> B <sub>2</sub> FeGeN <sub>6</sub> | C <sub>62</sub> H <sub>80</sub> B <sub>2</sub> FeN <sub>6</sub> Sn | C <sub>62</sub> H <sub>80</sub> B <sub>2</sub> FeN <sub>6</sub> Pb | C <sub>62</sub> H <sub>82</sub> B <sub>2</sub> FeN <sub>6</sub> OSi |
| Formula weight                              | 988.80                                                           | 1349.23                                                                           | 1092.98                                                            | 1059.38                                                           | 1105.48                                                            | 1193.98                                                            | 1032.89                                                             |
| Crystal system                              | orthorhombic                                                     | triclinic                                                                         | monoclinic                                                         | monoclinic                                                        | triclinic                                                          | triclinic                                                          | monoclinic                                                          |
| Space group                                 | <i>Aea</i> 2                                                     | <i>P</i> -1                                                                       | <i>P</i> 2 <sub>1</sub> / <i>c</i>                                 | <i>P</i> 2 <sub>1</sub> / <i>c</i>                                | <i>P</i> -1                                                        | <i>P</i> -1                                                        | <i>P</i> 2 <sub>1</sub> / <i>c</i>                                  |
| <i>a</i> /Å                                 | 8.9740(4)                                                        | 13.5366(7)                                                                        | 20.8000(8)                                                         | 20.4144(11)                                                       | 10.6958(3)                                                         | 10.7135(5)                                                         | 12.2033(8)                                                          |
| <i>b</i> /Å                                 | 29.2515(17)                                                      | 16.4231(9)                                                                        | 22.0814(6)                                                         | 21.9544(8)                                                        | 14.2662(4)                                                         | 14.3200(7)                                                         | 23.7917(17)                                                         |
| <i>c</i> /Å                                 | 21.3053(9)                                                       | 19.0854(10)                                                                       | 14.5347(6)                                                         | 14.6481(7)                                                        | 20.2598(6)                                                         | 20.0251(10)                                                        | 19.6371(12)                                                         |
| <i>α</i> /°                                 | 90                                                               | 94.408(4)                                                                         | 90                                                                 | 90                                                                | 109.087(2)                                                         | 108.398(4)                                                         | 90                                                                  |
| <i>β</i> /°                                 | 90                                                               | 108.594(4)                                                                        | 102.468(3)                                                         | 104.662(4)                                                        | 100.421(3)                                                         | 101.468(4)                                                         | 92.103(5)                                                           |
| <i>γ</i> /°                                 | 90                                                               | 96.918(4)                                                                         | 90                                                                 | 90                                                                | 94.724(2)                                                          | 94.946(4)                                                          | 90                                                                  |
| Volume/Å <sup>3</sup>                       | 5592.7(5)                                                        | 3962.1(4)                                                                         | 6518.3(4)                                                          | 6351.3(5)                                                         | 2839.77(15)                                                        | 2820.1(2)                                                          | 5697.5(7)                                                           |
| <i>Z</i>                                    | 4                                                                | 2                                                                                 | 4                                                                  | 4                                                                 | 2                                                                  | 2                                                                  | 4                                                                   |
| $\rho_{\text{calcd}}$ /g cm <sup>-3</sup>   | 1.174                                                            | 1.131                                                                             | 1.114                                                              | 1.108                                                             | 1.293                                                              | 1.406                                                              | 1.204                                                               |
| $\mu$ /mm <sup>-1</sup>                     | 2.485                                                            | 1.886                                                                             | 2.348                                                              | 2.704                                                             | 5.870                                                              | 3.282                                                              | 0.332                                                               |
| <i>F</i> (000)                              | 2128.0                                                           | 1460.0                                                                            | 2344.0                                                             | 2248.0                                                            | 1160.0                                                             | 1224.0                                                             | 2216.0                                                              |
| Crystal size/mm <sup>3</sup>                | 0.13 × 0.12 × 0.04                                               | 0.10 × 0.09 × 0.09                                                                | 0.28 × 0.19 × 0.03                                                 | 0.17 × 0.10 × 0.03                                                | 0.24 × 0.11 × 0.02                                                 | 0.17 × 0.11 × 0.04                                                 | 0.43 × 0.21 × 0.05                                                  |
| Radiation used                              | Cu K <sub>α</sub> (λ = 1.54186 Å)                                | Cu K <sub>α</sub> (λ = 1.54186 Å)                                                 | Cu K <sub>α</sub> (λ = 1.54186 Å)                                  | Cu K <sub>α</sub> (λ = 1.54186 Å)                                 | Cu K <sub>α</sub> (λ = 1.54186 Å)                                  | Mo K <sub>α</sub> (λ = 0.71073 Å)                                  | Mo K <sub>α</sub> (λ = 0.71073 Å)                                   |
| 2 $\theta$ range for data collection/°      | 6.042 to 140.918                                                 | 5.462 to 142.496                                                                  | 5.912 to 142.034                                                   | 6.02 to 137.986                                                   | 6.634 to 141.846                                                   | 2.208 to 51.704                                                    | 2.69 to 52.77                                                       |
| Index ranges                                | -7 ≤ <i>h</i> ≤ 10<br>-33 ≤ <i>k</i> ≤ 35<br>-25 ≤ <i>l</i> ≤ 12 | -14 ≤ <i>h</i> ≤ 16<br>-16 ≤ <i>k</i> ≤ 20<br>-19 ≤ <i>l</i> ≤ 23                 | -25 ≤ <i>h</i> ≤ 24<br>-25 ≤ <i>k</i> ≤ 13<br>-17 ≤ <i>l</i> ≤ 16  | -24 ≤ <i>h</i> ≤ 24<br>-26 ≤ <i>k</i> ≤ 19<br>-17 ≤ <i>l</i> ≤ 11 | -7 ≤ <i>h</i> ≤ 12<br>-16 ≤ <i>k</i> ≤ 17<br>-24 ≤ <i>l</i> ≤ 21   | -12 ≤ <i>h</i> ≤ 13<br>-17 ≤ <i>k</i> ≤ 17<br>-24 ≤ <i>l</i> ≤ 24  | -15 ≤ <i>h</i> ≤ 14<br>-27 ≤ <i>k</i> ≤ 29<br>-24 ≤ <i>l</i> ≤ 24   |
| Refl. collected                             | 10412                                                            | 34905                                                                             | 27165                                                              | 23235                                                             | 22454                                                              | 19459                                                              | 25310                                                               |
| Independent refl.                           | 3424 [ <i>R</i> <sub>int</sub> = 0.0902]                         | 14695 [ <i>R</i> <sub>int</sub> = 0.0432]                                         | 11825 [ <i>R</i> <sub>int</sub> = 0.0533]                          | 11270 [ <i>R</i> <sub>int</sub> = 0.0870]                         | 10527 [ <i>R</i> <sub>int</sub> = 0.0308]                          | 10646 [ <i>R</i> <sub>int</sub> = 0.0605]                          | 11500 [ <i>R</i> <sub>int</sub> = 0.0687]                           |
| Data/restr./param.                          | 3424/1/330                                                       | 14695/57/974                                                                      | 11825/0/719                                                        | 11270/0/665                                                       | 10527/0/665                                                        | 10646/0/666                                                        | 11500/0/693                                                         |
| Goodness-of-fit on <i>F</i> <sup>2</sup>    | 1.055                                                            | 1.021                                                                             | 1.025                                                              | 1.035                                                             | 1.035                                                              | 1.093                                                              | 1.020                                                               |
| Final <i>R</i> indexes                      | <i>R</i> <sub>1</sub> = 0.0738                                   | <i>R</i> <sub>1</sub> = 0.0549                                                    | <i>R</i> <sub>1</sub> = 0.0650                                     | <i>R</i> <sub>1</sub> = 0.0748                                    | <i>R</i> <sub>1</sub> = 0.0407                                     | <i>R</i> <sub>1</sub> = 0.0551                                     | <i>R</i> <sub>1</sub> = 0.0850                                      |
| [ <i>I</i> > 2σ( <i>I</i> )]                | <i>wR</i> <sub>2</sub> = 0.1533                                  | <i>wR</i> <sub>2</sub> = 0.1093                                                   | <i>wR</i> <sub>2</sub> = 0.1446                                    | <i>wR</i> <sub>2</sub> = 0.1752                                   | <i>wR</i> <sub>2</sub> = 0.1039                                    | <i>wR</i> <sub>2</sub> = 0.1463                                    | <i>wR</i> <sub>2</sub> = 0.2209                                     |
| Final <i>R</i> indexes                      | <i>R</i> <sub>1</sub> = 0.1146                                   | <i>R</i> <sub>1</sub> = 0.0930                                                    | <i>R</i> <sub>1</sub> = 0.1112                                     | <i>R</i> <sub>1</sub> = 0.1347                                    | <i>R</i> <sub>1</sub> = 0.0491                                     | <i>R</i> <sub>1</sub> = 0.0654                                     | <i>R</i> <sub>1</sub> = 0.1209                                      |
| [all data]                                  | <i>wR</i> <sub>2</sub> = 0.1736                                  | <i>wR</i> <sub>2</sub> = 0.1273                                                   | <i>wR</i> <sub>2</sub> = 0.1667                                    | <i>wR</i> <sub>2</sub> = 0.2146                                   | <i>wR</i> <sub>2</sub> = 0.1098                                    | <i>wR</i> <sub>2</sub> = 0.1575                                    | <i>wR</i> <sub>2</sub> = 0.2537                                     |
| Largest diff. peak/hole / e Å <sup>-3</sup> | 0.76/-0.34                                                       | 0.72/-0.61                                                                        | 0.70/-0.55                                                         | 0.72/-0.83                                                        | 1.05/-1.11                                                         | 1.67/-2.38                                                         | 1.28/-0.82                                                          |
| Flack parameter                             | 0.362(15)                                                        |                                                                                   |                                                                    |                                                                   |                                                                    |                                                                    |                                                                     |
| CCDC No.                                    | 2289080                                                          | 2289081                                                                           | 2289082                                                            | 2289083                                                           | 2289084                                                            | 2289085                                                            | 2289086                                                             |

## Plots of NMR spectra

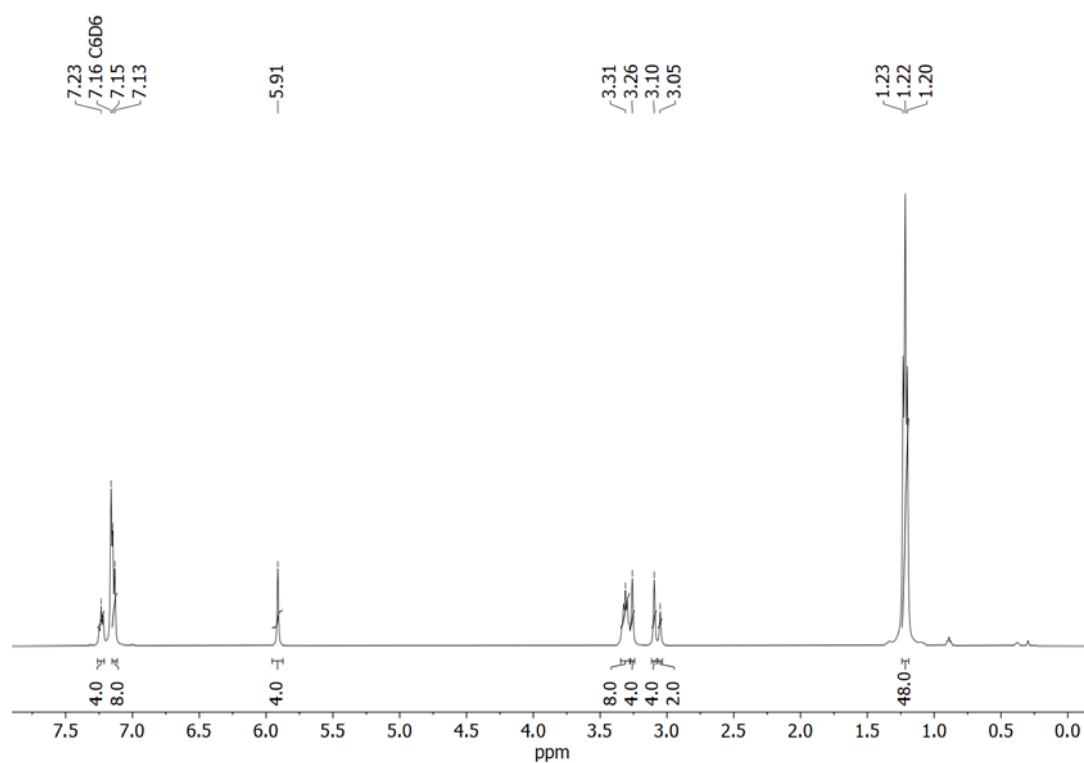

Figure S1:  $^1\text{H}$  NMR ( $\text{C}_6\text{D}_6$ , 500 MHz) of  $1\text{H}_2$ .

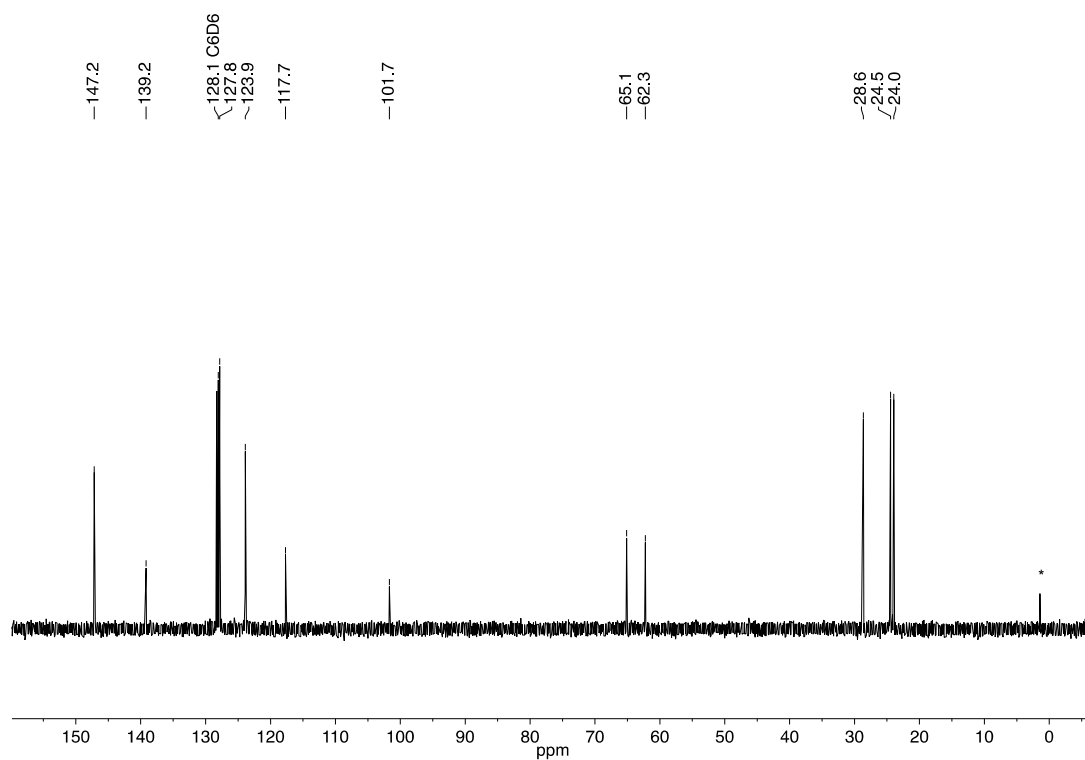

Figure S2:  $^{13}\text{C}\{^1\text{H}\}$  NMR ( $\text{C}_6\text{D}_6$ , 100 MHz) of  $1\text{H}_2$ . The signal marked (\*) belongs to silicon grease.

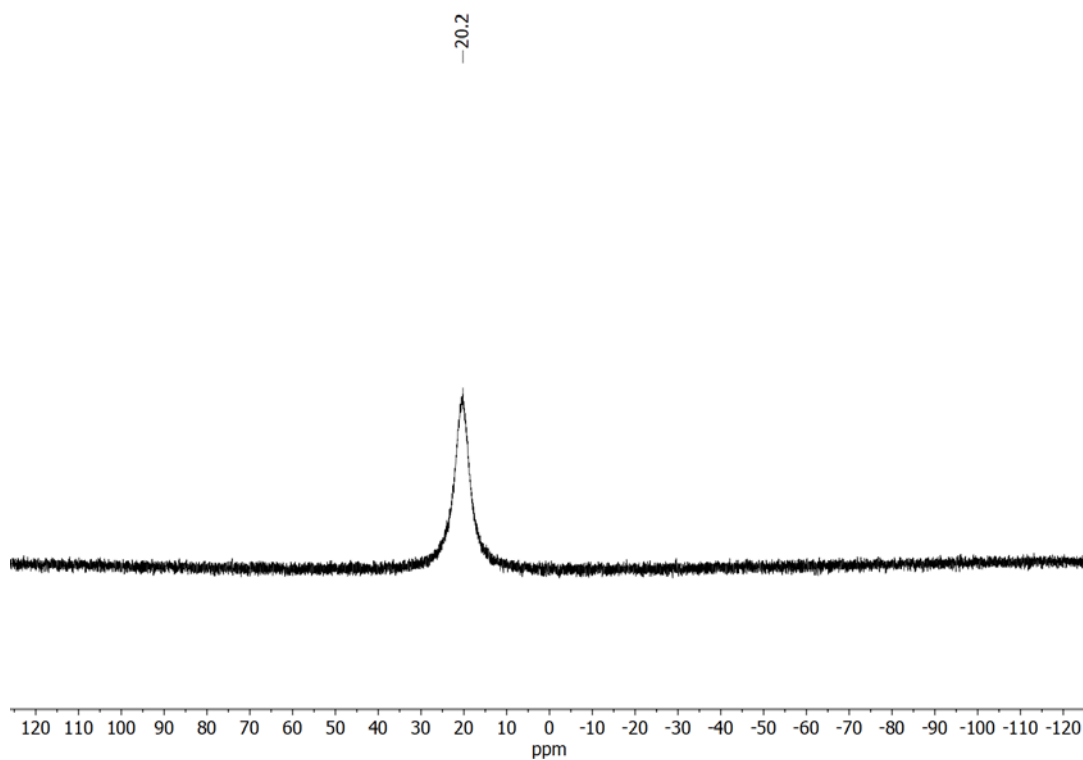

Figure S3:  $^{11}\text{B}$  NMR ( $\text{C}_6\text{D}_6$ , 160 MHz) of  $1\text{H}_2$ .

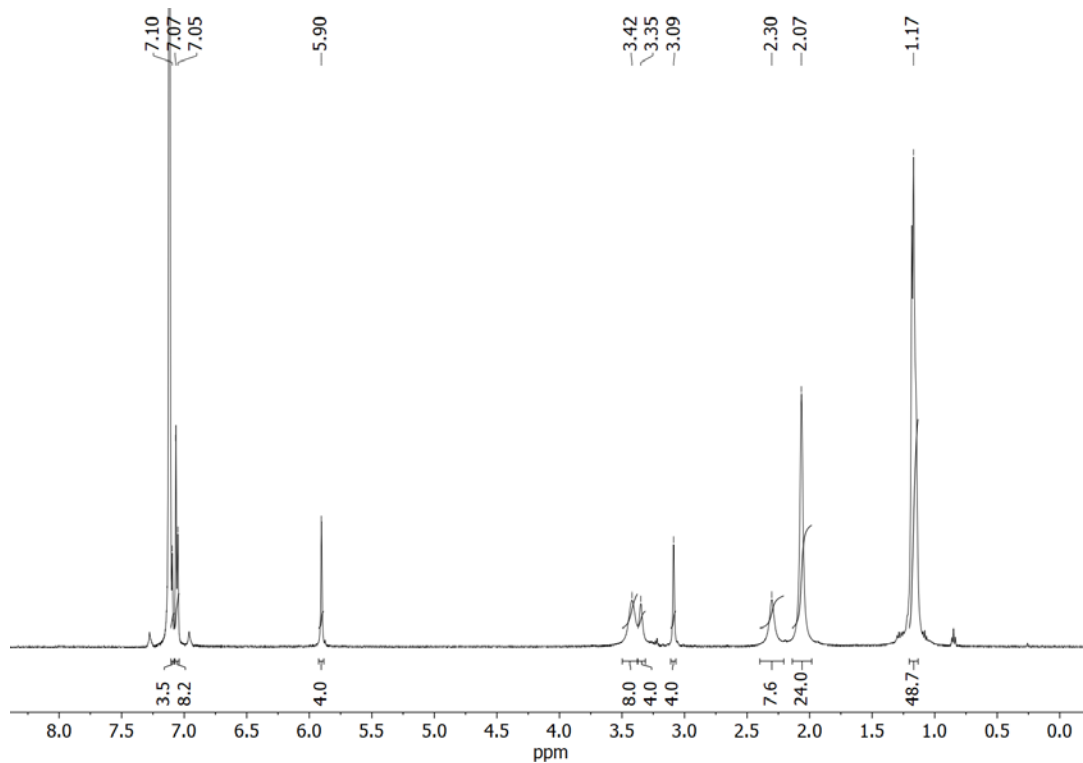

Figure S4:  $^1\text{H}$  NMR ( $\text{C}_6\text{D}_6$ , 500 MHz) of  $[1\text{Li}_2(\text{TMEDA})_2]$ .

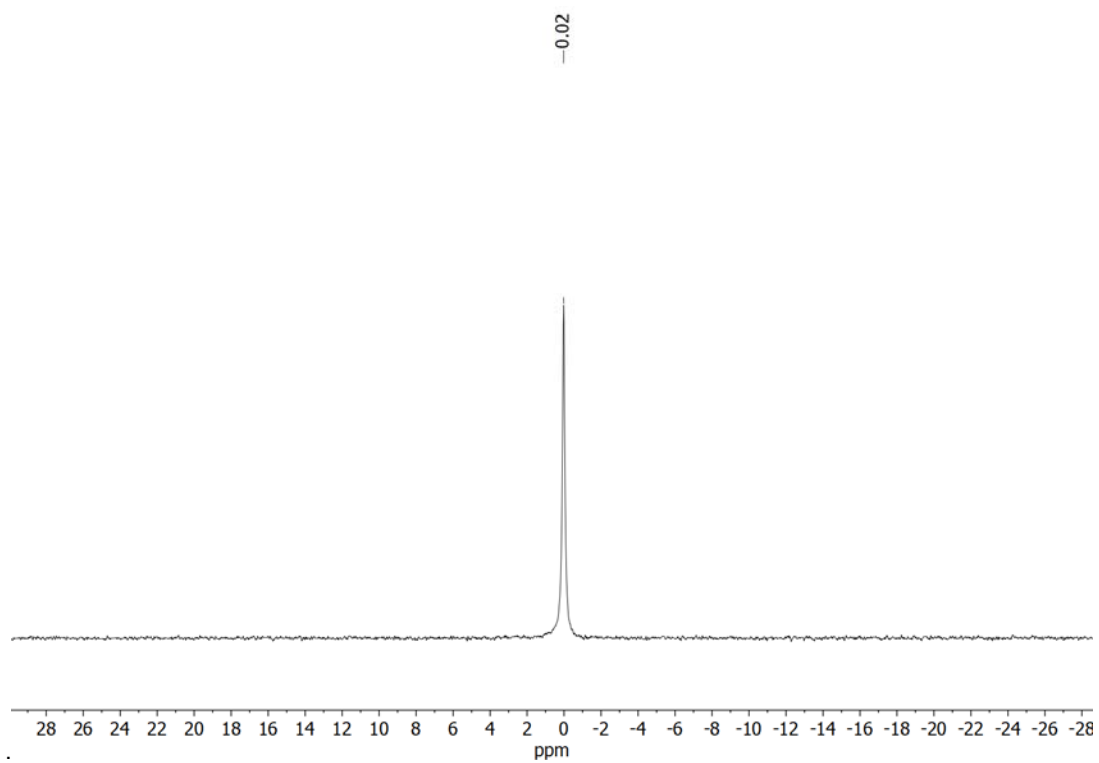

**Figure S5:**  ${}^7\text{Li}$  NMR ( $\text{C}_6\text{D}_6$ , 194 MHz) of  $[\text{1Li}_2(\text{TMEDA})_2]$ .

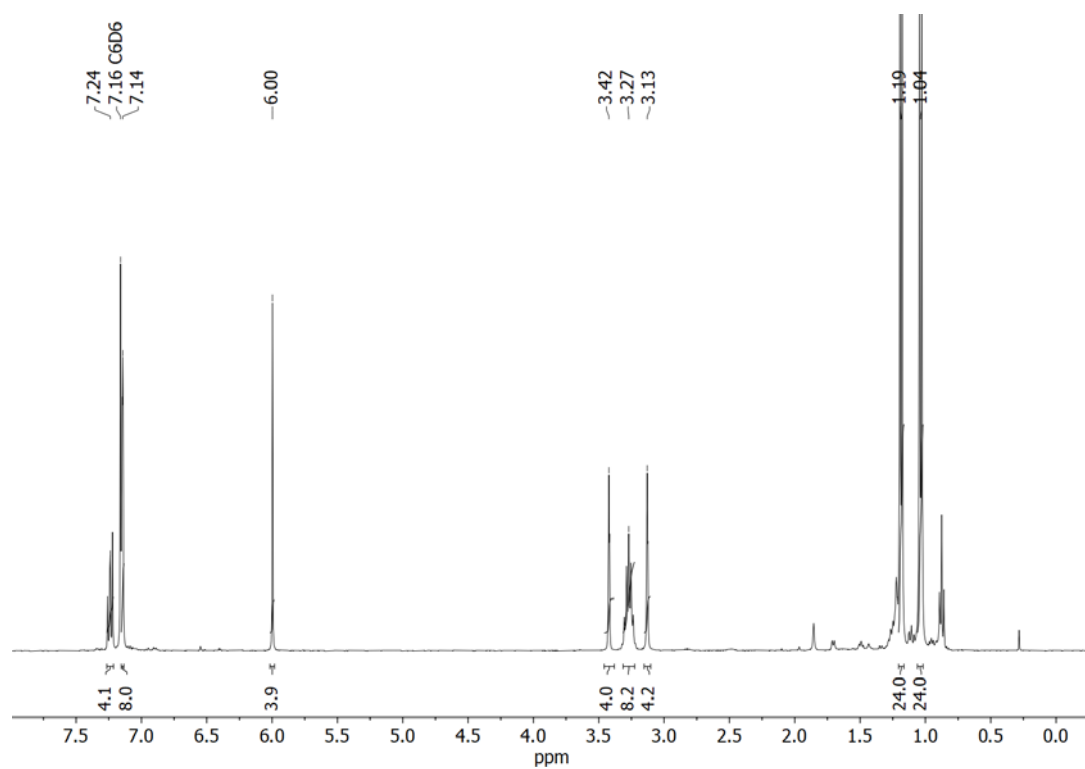

**Figure S6:**  ${}^1\text{H}$  NMR ( $\text{C}_6\text{D}_6$ , 500 MHz) of  $1\text{Si}$ .

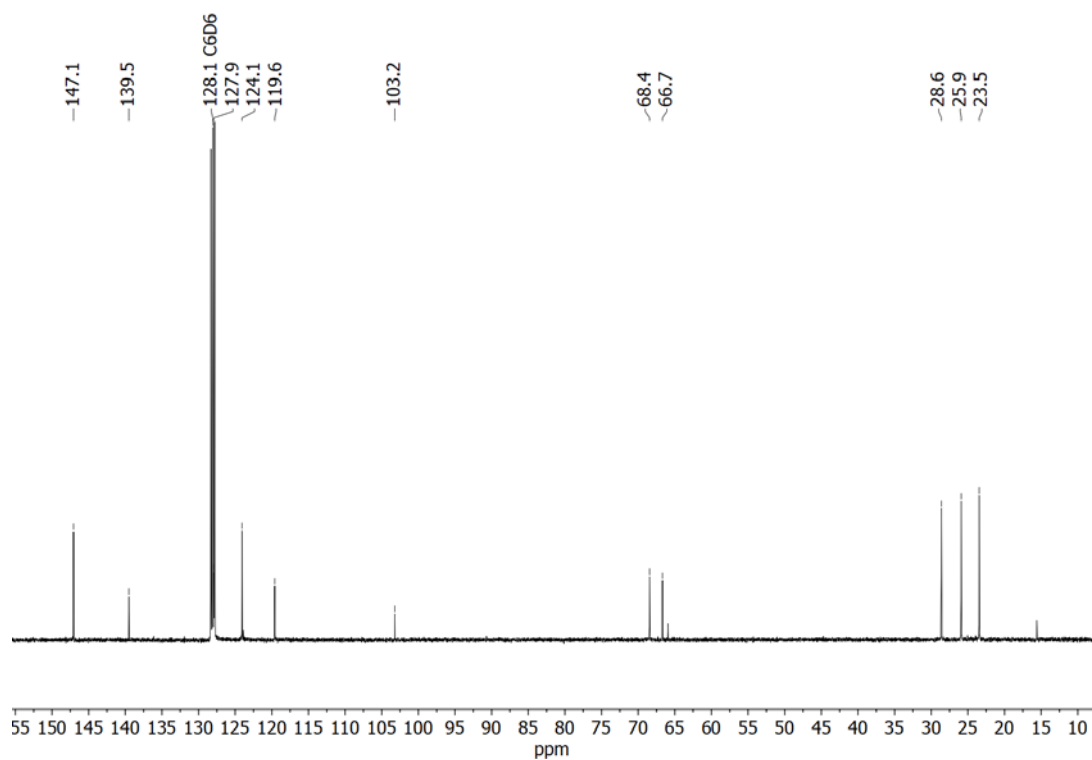

**Figure S7:**  $^{13}\text{C}$  NMR ( $\text{C}_6\text{D}_6$ , 101 MHz) of **1Si**.

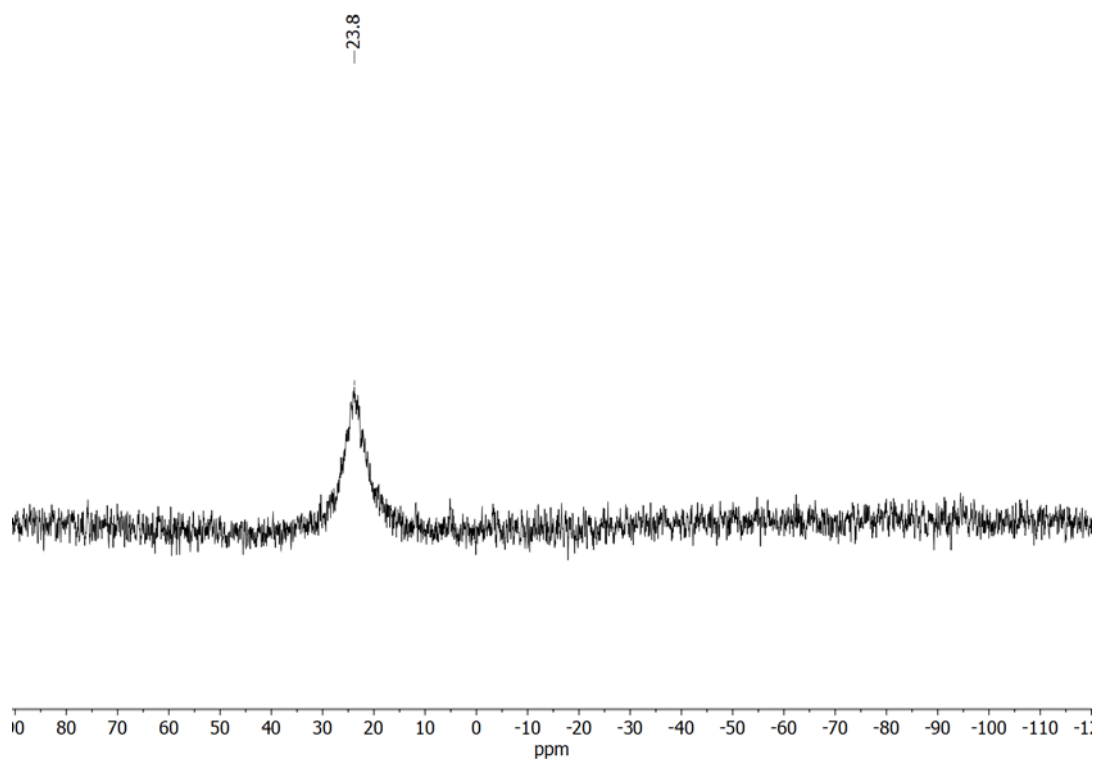

**Figure S8:**  $^{11}\text{B}$  NMR ( $\text{C}_6\text{D}_6$ , 160 MHz) of **1Si**.

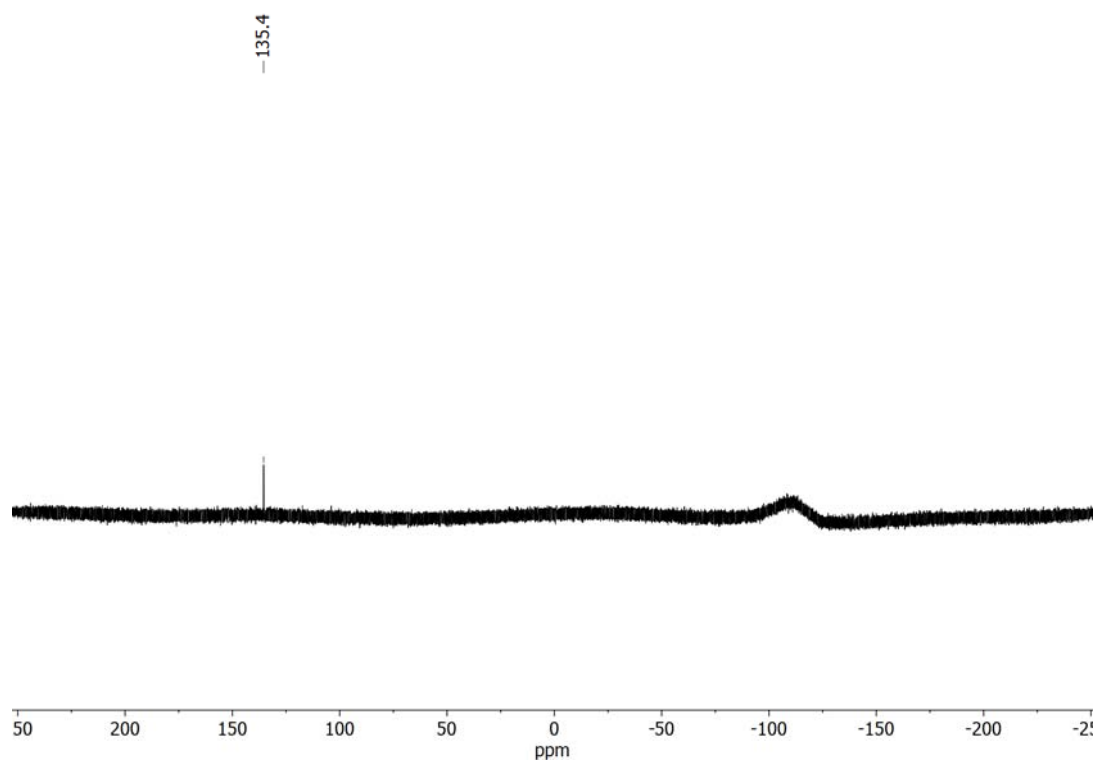

**Figure S9:**  $^{29}\text{Si}$  NMR ( $\text{C}_6\text{D}_6$ , 99 MHz) of **1Si**.

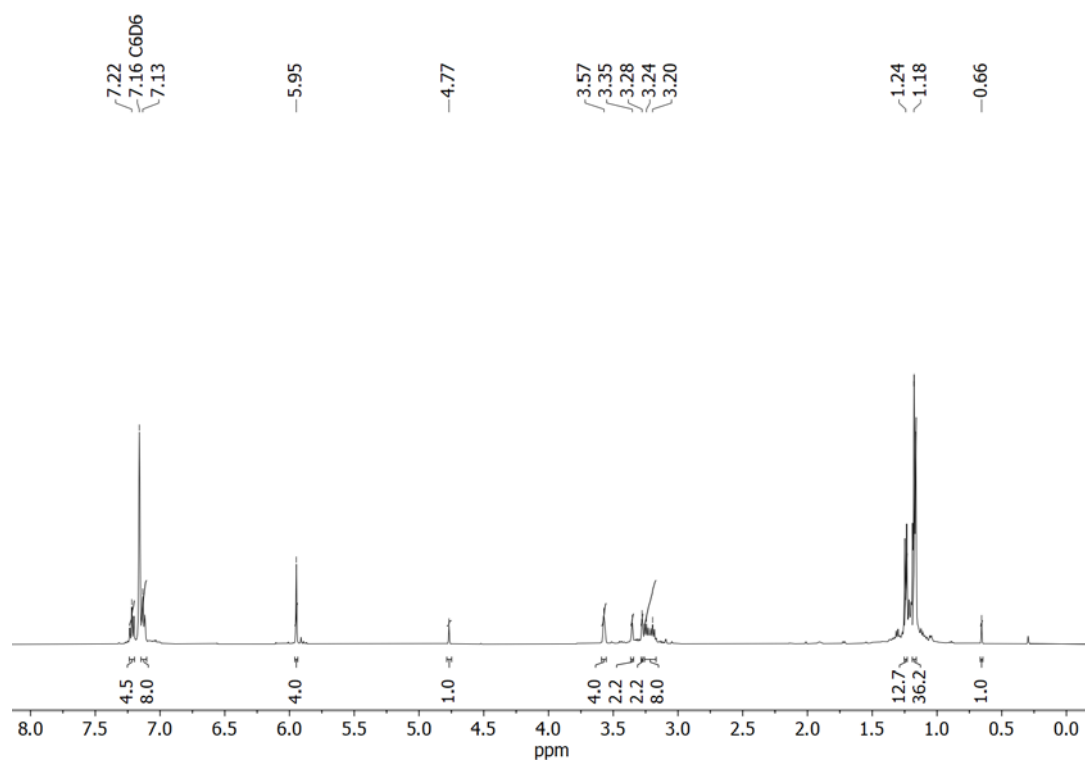

**Figure S10:**  $^1\text{H}$  NMR ( $\text{C}_6\text{D}_6$ , 500 MHz) of **1Si(OH)H**.

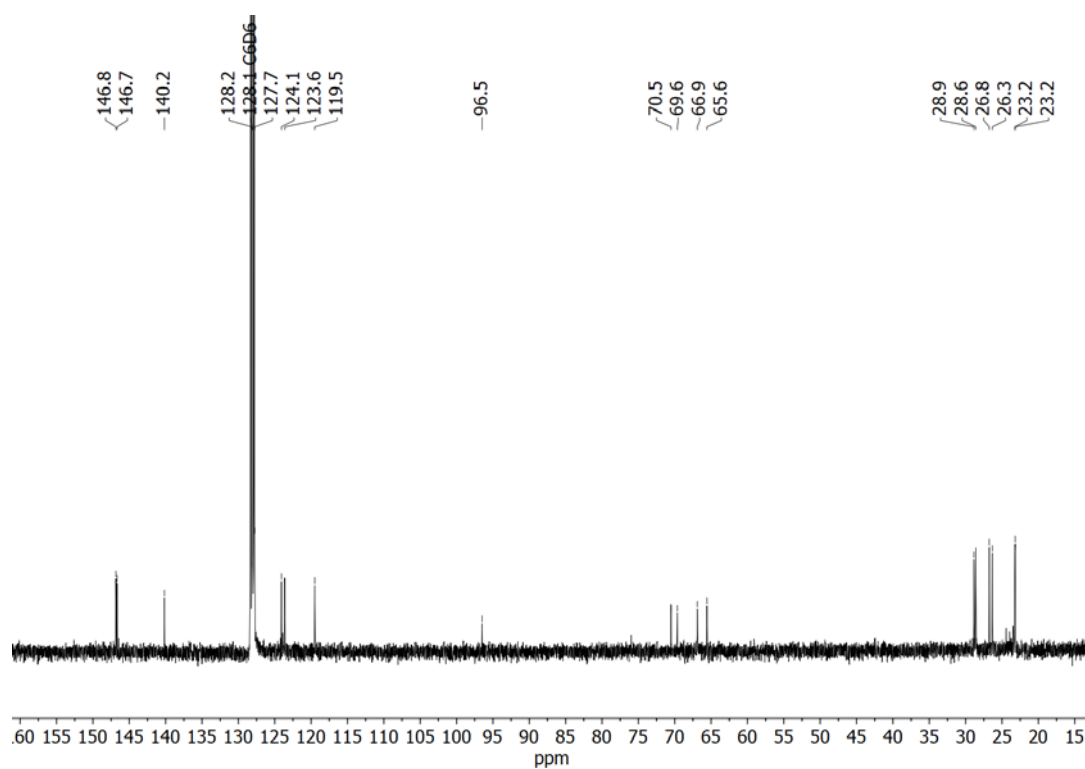

**Figure S11:**  $^{13}\text{C}$  NMR ( $\text{C}_6\text{D}_6$ , 101 MHz) of  $1\text{Si}(\text{OH})\text{H}$ .

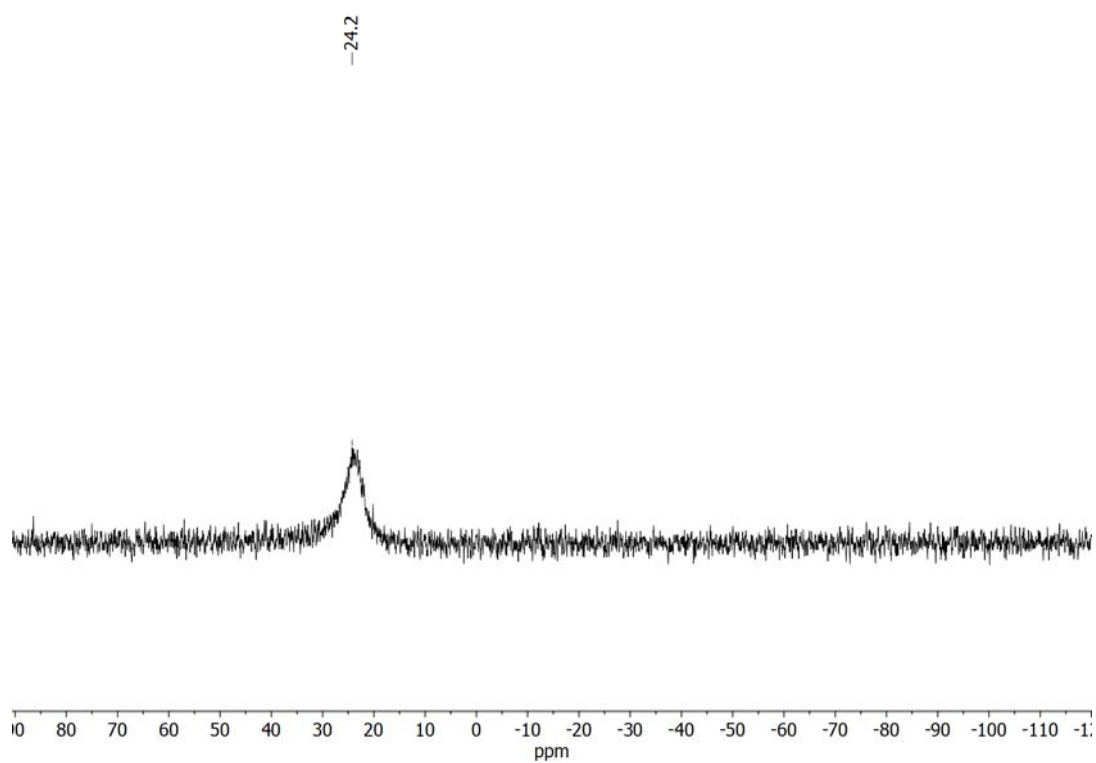

**Figure S12:**  $^{11}\text{B}$  NMR ( $\text{C}_6\text{D}_6$ , 160 MHz) of  $1\text{Si}(\text{OH})\text{H}$ .



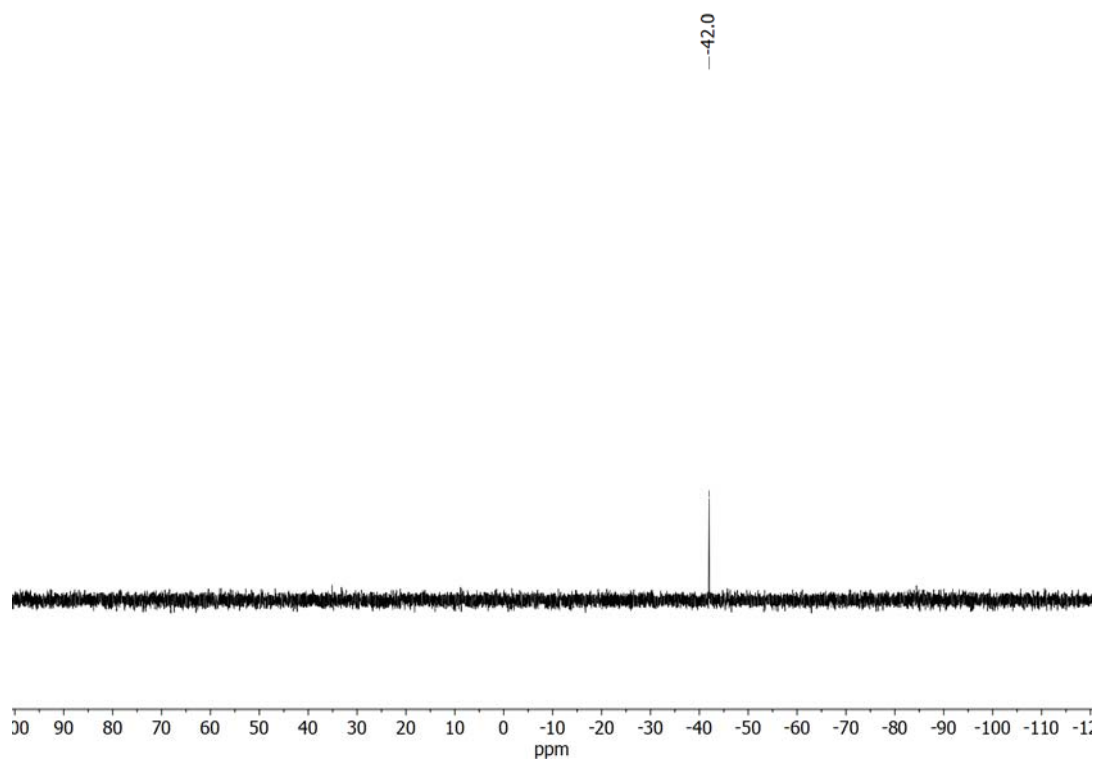

**Figure S13:**  $^{29}\text{Si}\{^1\text{H}\}$  DEPT NMR ( $\text{C}_6\text{D}_6$ , 99 MHz) of  $1\text{Si}(\text{OH})\text{H}$ .

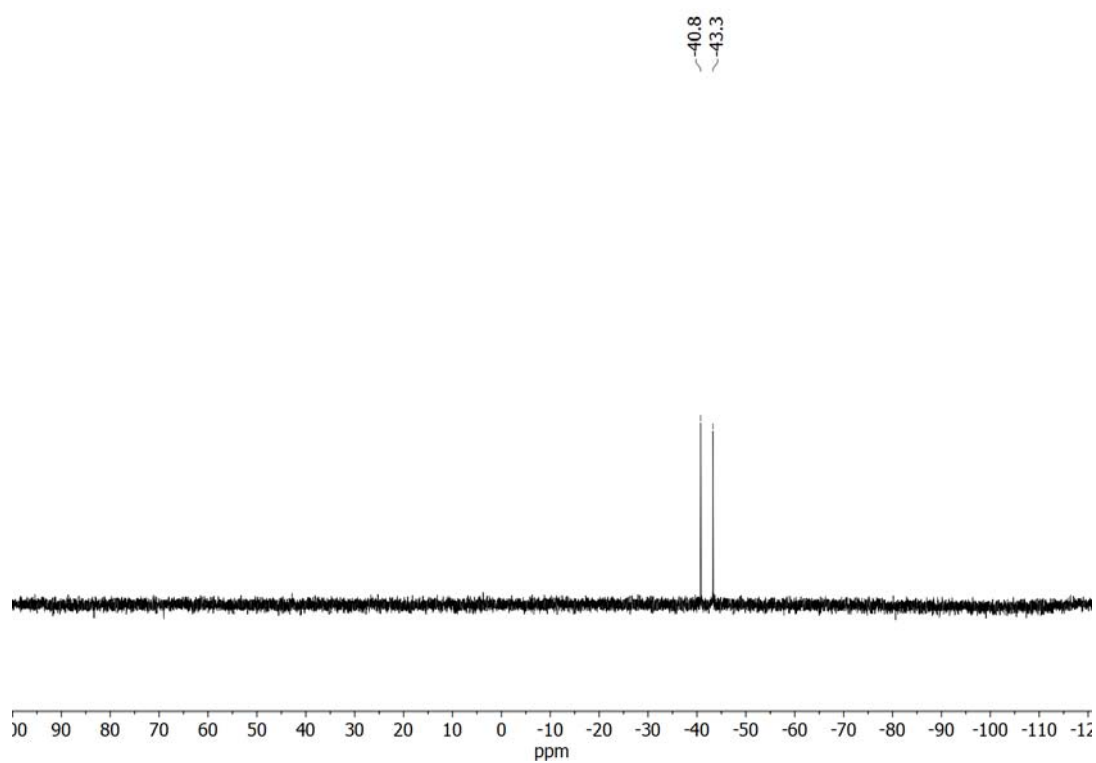

**Figure S14:**  $^{29}\text{Si}$  DEPT NMR ( $\text{C}_6\text{D}_6$ , 99 MHz) of  $1\text{Si}(\text{OH})\text{H}$ .

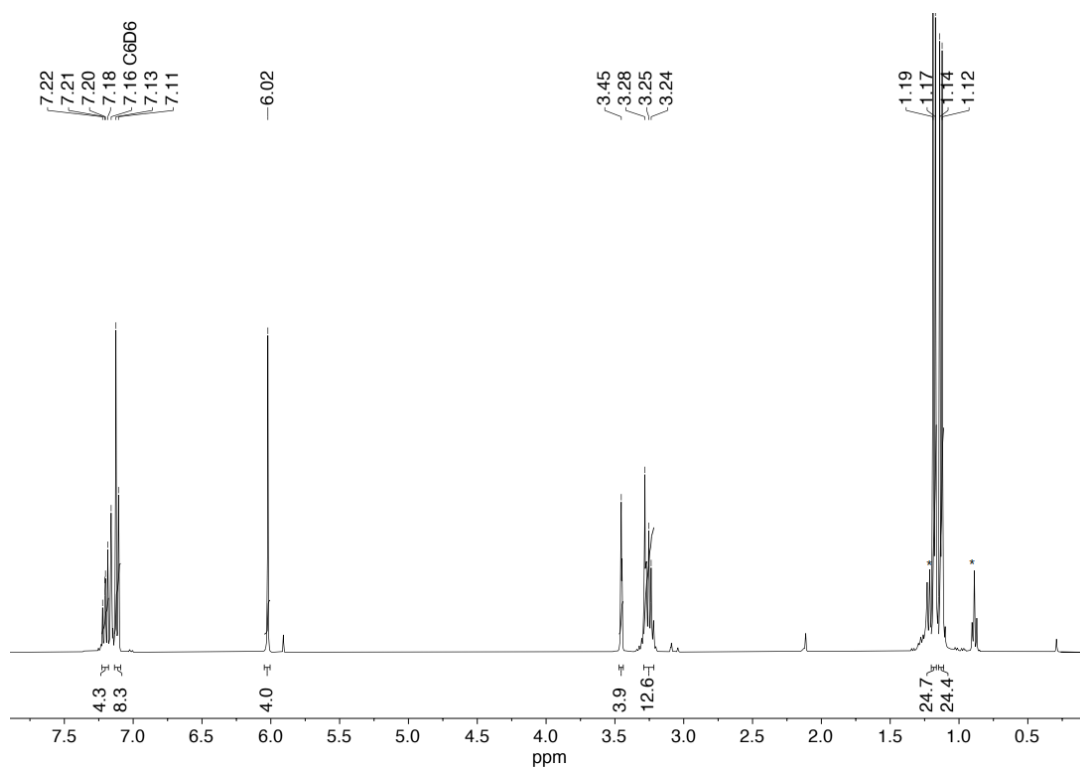

**Figure S15:** <sup>1</sup>H NMR (C<sub>6</sub>D<sub>6</sub>, 400 MHz) of **1Ge**. The signal marked (\*) belongs to trace amounts of *n*-hexane.

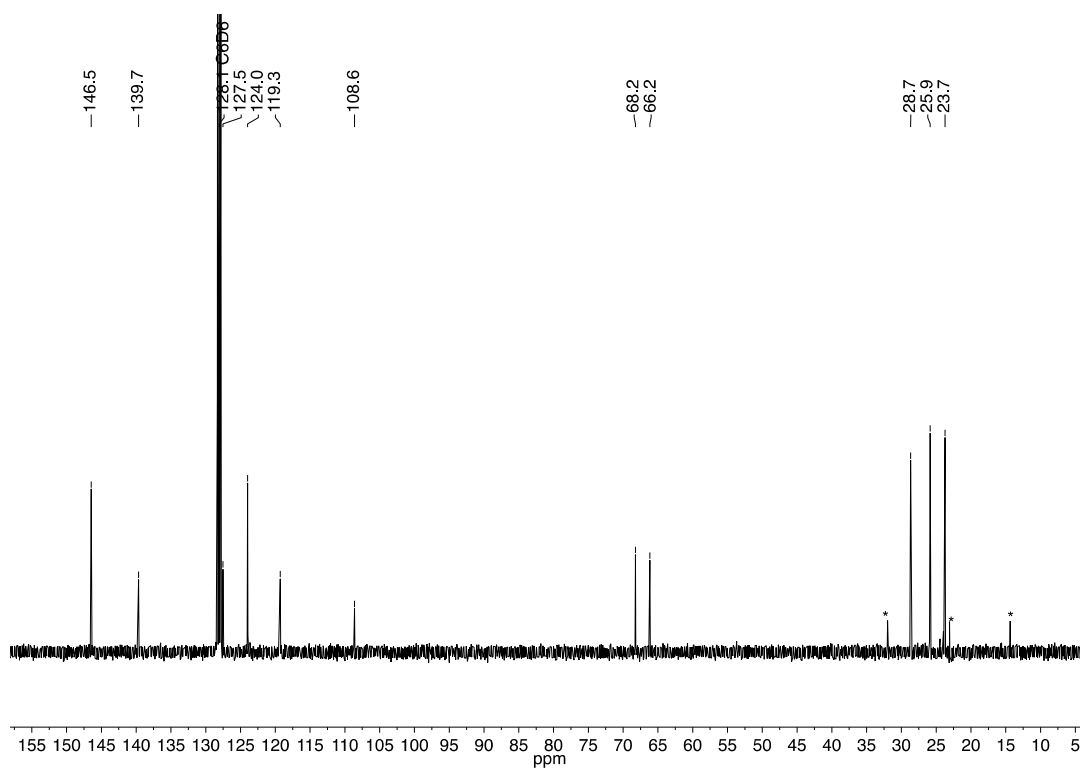

**Figure S16:** <sup>13</sup>C NMR (C<sub>6</sub>D<sub>6</sub>, 100 MHz) of **1Ge**. The signals marked (\*) belong to trace amounts of *n*-hexane.

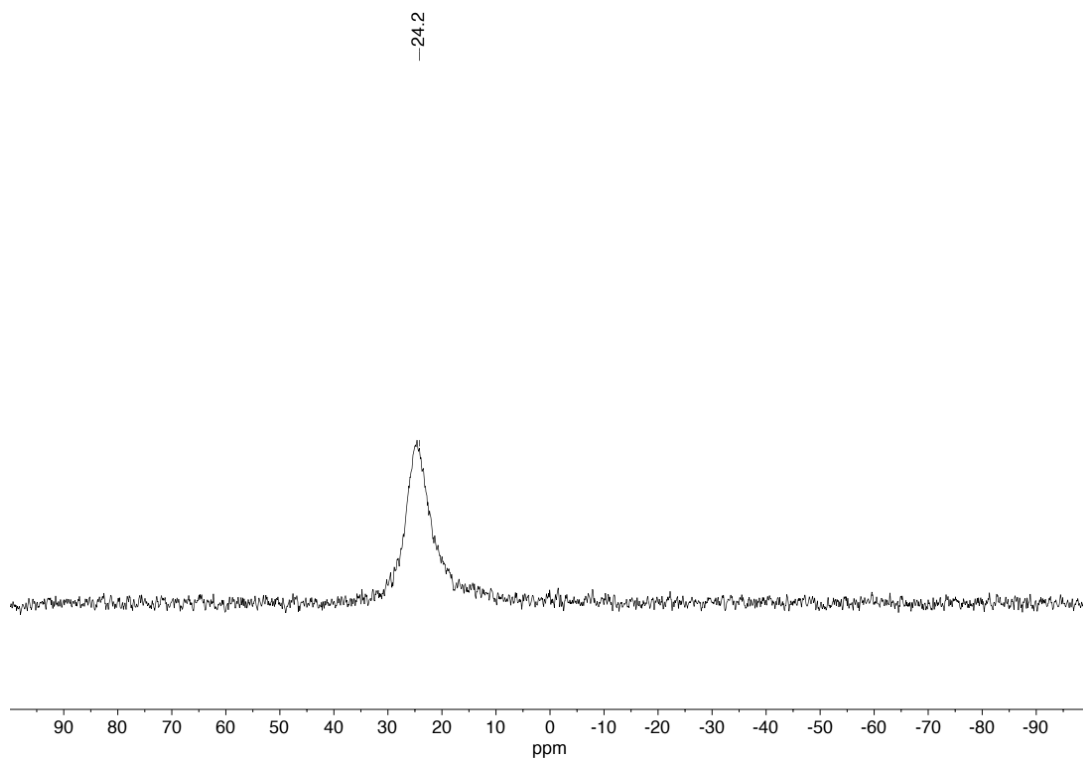

**Figure S17:**  $^{11}\text{B}$  NMR ( $\text{C}_6\text{D}_6$ , 160 MHz) of **1Ge**.

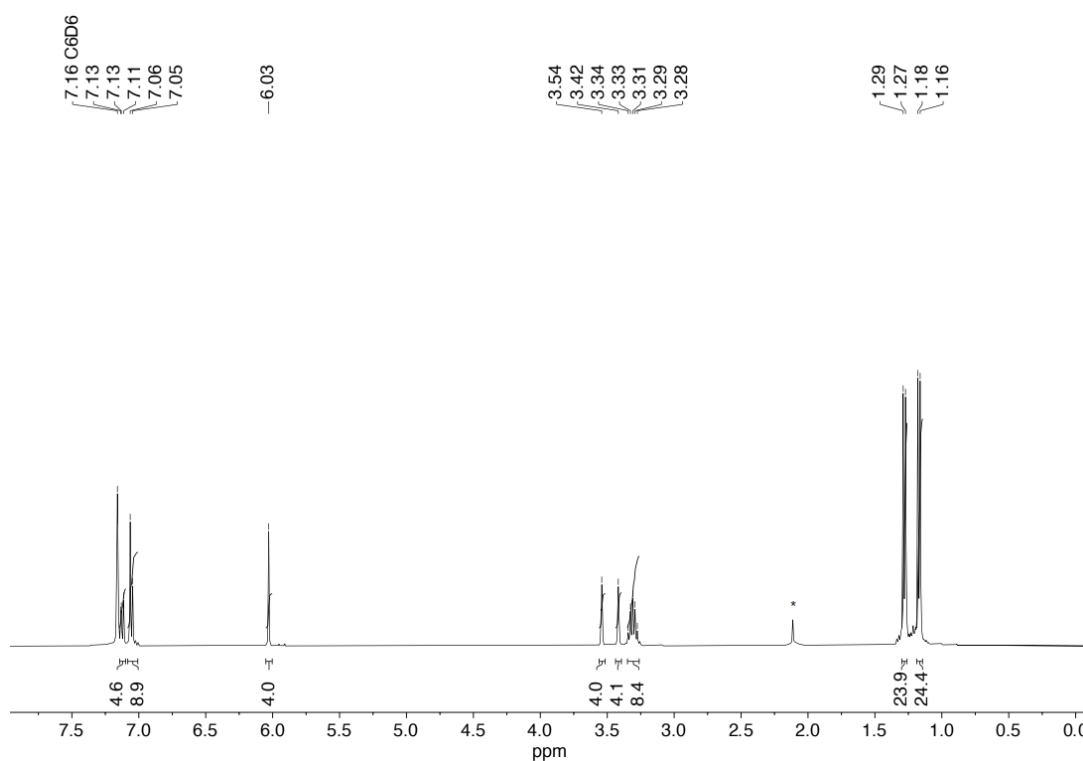

**Figure S18:**  $^1\text{H}$  NMR ( $\text{C}_6\text{D}_6$ , 400 MHz) of **1Sn**. The signal marked (\*) belongs to trace amounts of toluene.

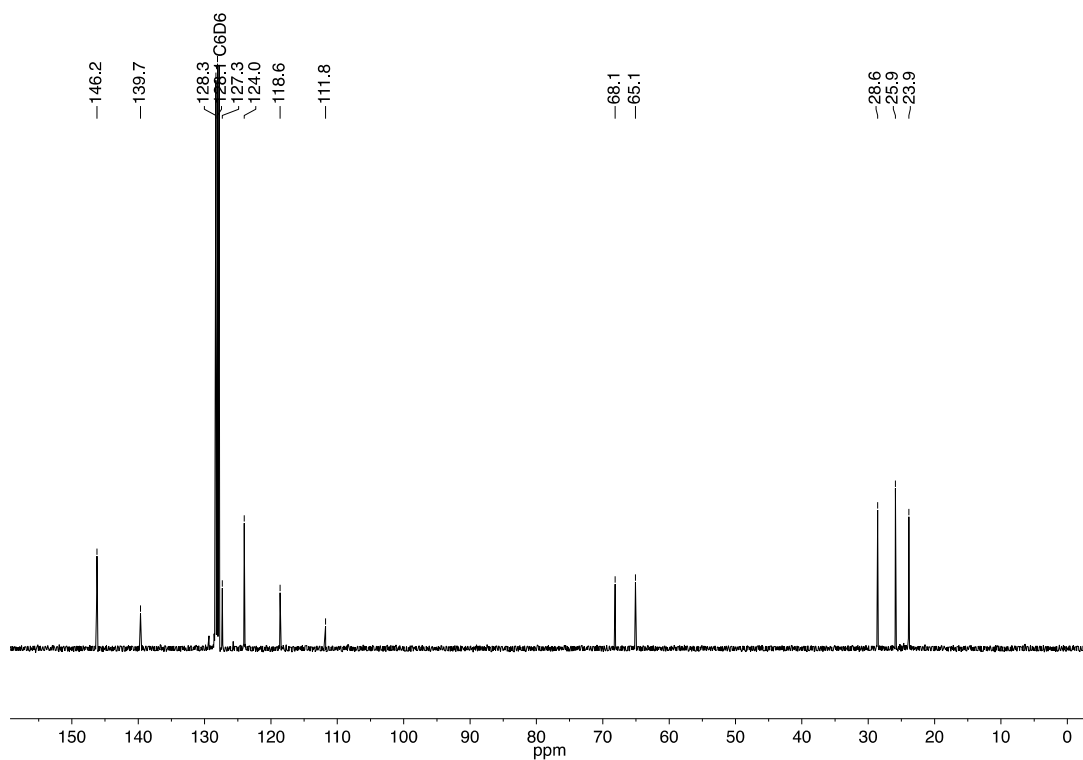

Figure S19:  $^{13}\text{C}$  NMR ( $\text{C}_6\text{D}_6$ , 100 MHz) of 1Sn.

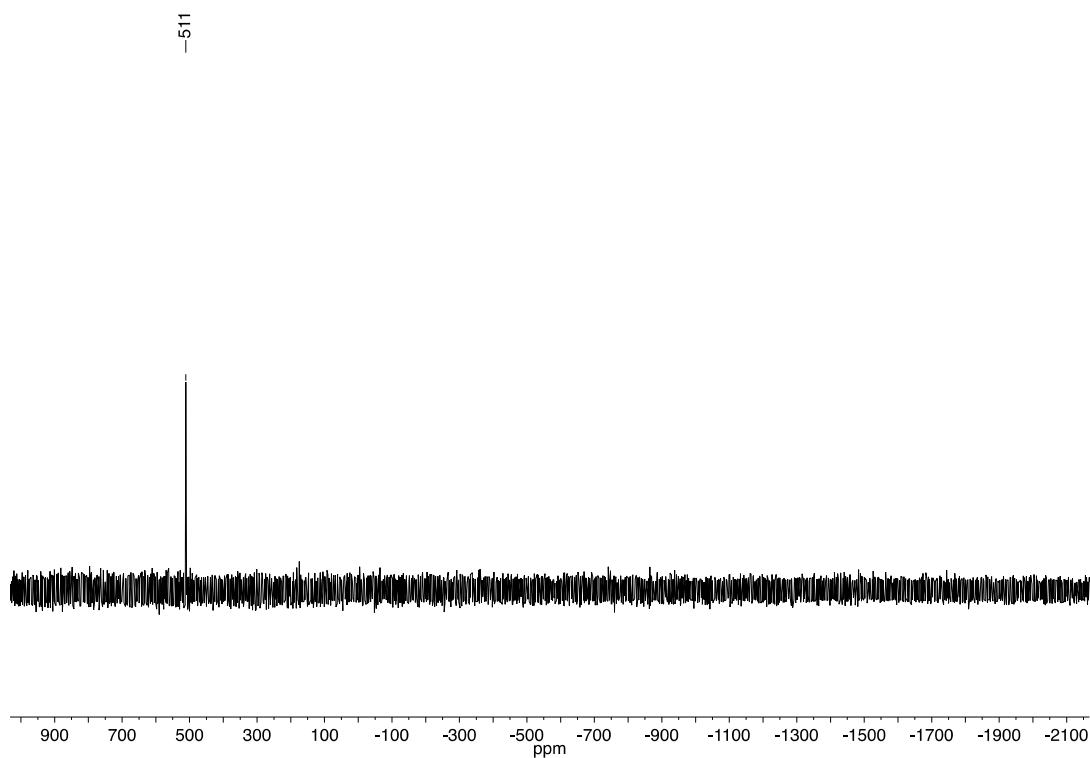

Figure S20:  $^{119}\text{Sn}$  NMR ( $\text{C}_6\text{D}_6$ , 186 MHz) of 1Sn.

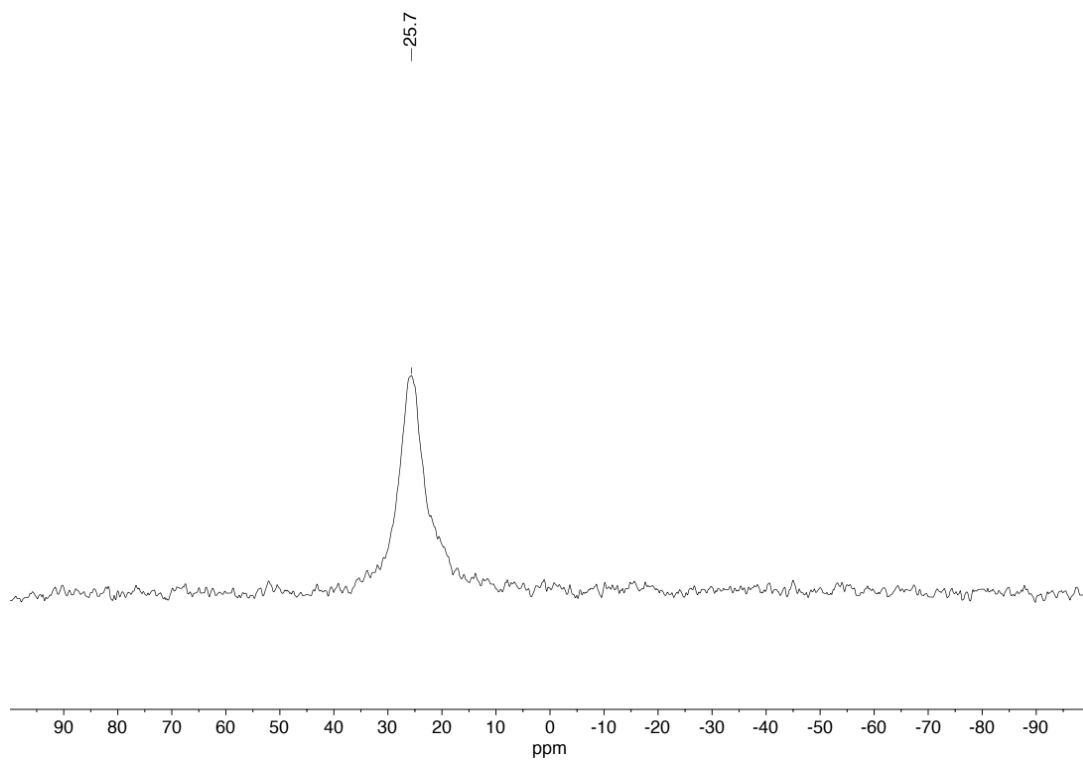

**Figure S21:**  $^{11}\text{B}$  NMR ( $\text{C}_6\text{D}_6$ , 160 MHz) of **1Sn**.

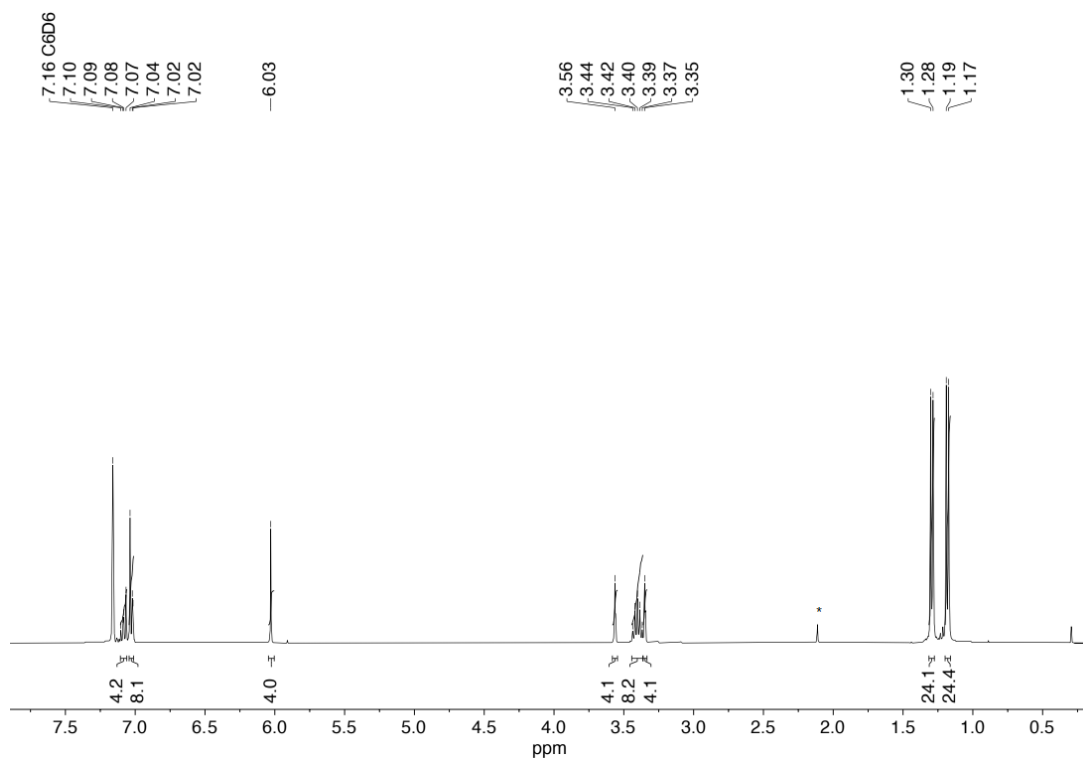

**Figure S22:**  $^1\text{H}$  NMR ( $\text{C}_6\text{D}_6$ , 400 MHz) of **1Pb**. The signal marked (\*) belongs to trace amounts of toluene.

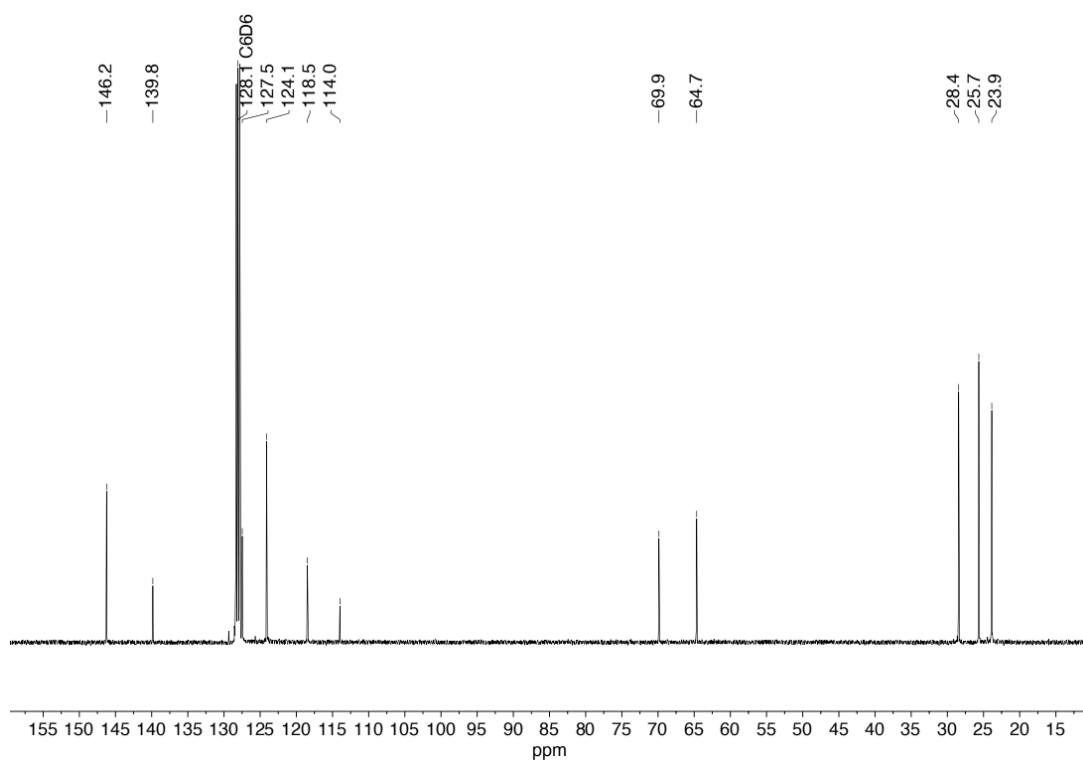

Figure S23:  $^{13}\text{C}$  NMR ( $\text{C}_6\text{D}_6$ , 100 MHz) of 1Pb.

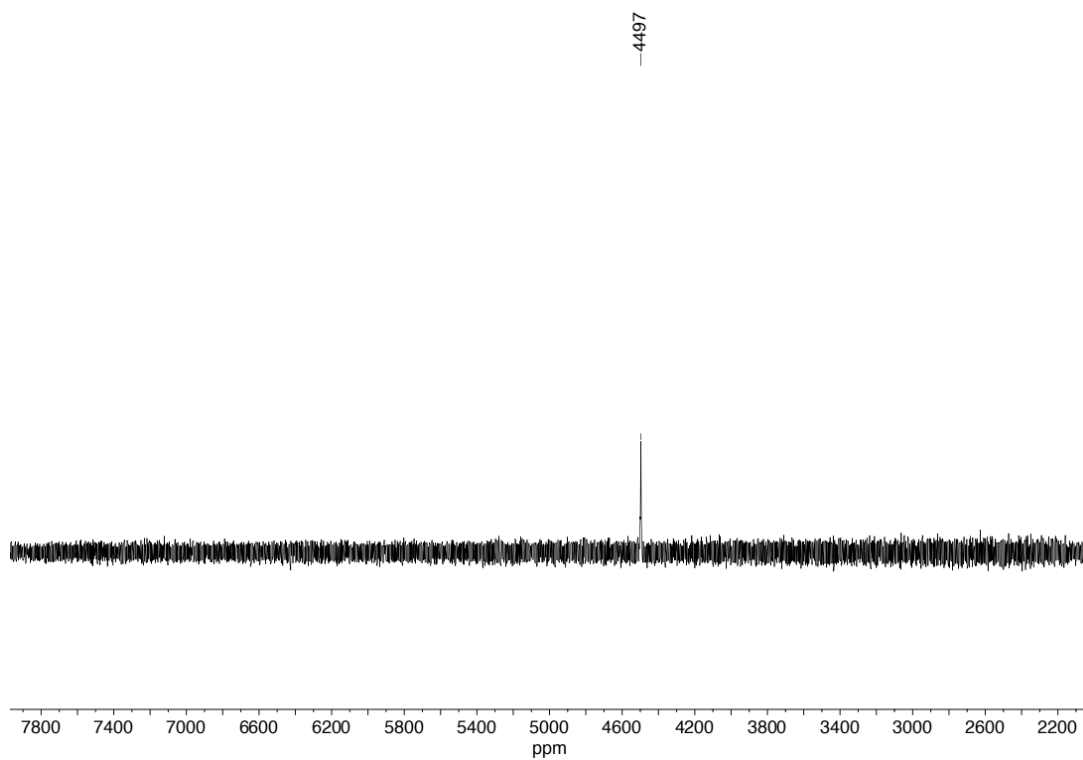

Figure S24:  $^{207}\text{Pb}$  NMR ( $\text{C}_6\text{D}_6$ , 105 MHz) of 1Pb.

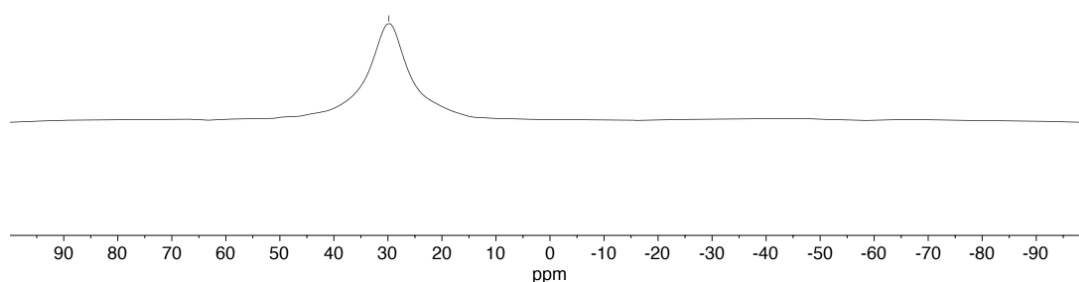

**Figure S25:**  $^{11}\text{B}$  NMR ( $\text{C}_6\text{D}_6$ , 160 MHz) of **1Pb**.

## B – Computational Details

The geometries of **1Si**,  $\text{fc}[(\text{NDipp})_2\text{Si}]$  and  $\text{fc}[(\text{NBMe}_2)_2\text{Si}]$  were optimised with the ORCA program package (Version 5.0.3)<sup>S1</sup> employing the PBEh-3c<sup>S2</sup> method and checked for imaginary frequencies to confirm the geometries as minima on the energy hypersurface. Single-point calculations with further methods were performed with Gaussian09<sup>S3</sup> employing the functionals B3LYP,<sup>S4</sup> M06-L<sup>S5</sup> and  $\omega\text{B97XD}$ <sup>S6</sup> in combination with the def2-TZVP<sup>S7</sup> basis set with Grimme's dispersion correction (D3) and Becke-Johnson damping.<sup>S8</sup> Pictures were generated with the ChemCraft program.<sup>S9</sup>

## Frontier orbital discussion

As previously reported<sup>S10</sup> it is becoming commonplace to tentatively correlate the energy difference  $\Delta E_{\text{LP/LUMO}}$  of assigned lone pair orbital (LP) and vacant orbital (LUMO) of a silylene with its reactivity, which, however, cannot be particularly reliable due to the method dependence of the energies. We find a higher  $\Delta E_{\text{LP/LUMO}}$  for **1Si** in comparison to  $\text{fc}[(\text{NDipp})_2\text{Si}]$  for each method, as is illustrated in Table S1.<sup>S10</sup> For the optimised model compound  $\text{fc}[(\text{NBMe}_2)_2\text{Si}]$  the orbitals are shown in Table S2.

**Table S2.** Frontier molecular orbitals of **1Si** obtained from calculations with different methods (PBEh-3c, B3LYP/def2-TZVP, M06-L/def2-TZVP and  $\omega$ B97XD/def2-TZVP; H atoms not shown, energies in eV, surfaces at  $0.05 a_0^{-3/2}$ ). Values used to calculate  $\Delta E_{L\text{P}/L\text{UMO}}$  are highlighted in red. For each method  $\Delta E_{L\text{P}/L\text{UMO}}$ ,  $E_{L\text{P}}$  and  $E_{L\text{UMO}}$  of **1Si** are compared with the corresponding values of  $\text{fc}[(\text{NDipp})_2\text{Si}]$ .<sup>S10</sup>

|      | PBEh-3c                                                                            | B3LYP  | M06-L  | $\omega$ B97XD |        |
|------|------------------------------------------------------------------------------------|--------|--------|----------------|--------|
| LUMO | 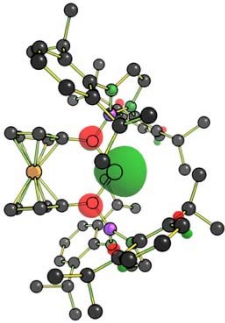  | -0.061 | -0.854 | -1.418         | 1.013  |
| HOMO |  | -6.223 | -5.360 | -4.353         | -7.309 |



Table S2 (continued)

|        |                                                                                     |        |                                                                                      |        |                                                                                       |        |                                                                                       |        |
|--------|-------------------------------------------------------------------------------------|--------|--------------------------------------------------------------------------------------|--------|---------------------------------------------------------------------------------------|--------|---------------------------------------------------------------------------------------|--------|
| HOMO-1 | 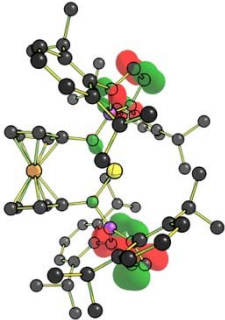   | -6.336 |    | -5.398 |    | -4.393 |    | -7.418 |
| HOMO-2 |    | -6.651 |    | -5.483 |    | -4.633 |    | -7.698 |
| HOMO-3 |  | -6.977 |  | -5.504 |  | -4.691 |  | -7.857 |

**Table S2** (continued)

|                                                                                          |                                                                                   |        |                                                                                    |        |                                                                                     |        |                                                                                     |        |
|------------------------------------------------------------------------------------------|-----------------------------------------------------------------------------------|--------|------------------------------------------------------------------------------------|--------|-------------------------------------------------------------------------------------|--------|-------------------------------------------------------------------------------------|--------|
| HOMO-4                                                                                   | 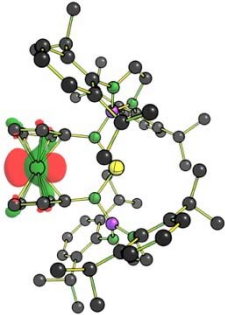 | -7.065 |  | -5.810 |  | -4.733 |  | -8.486 |
| HOMO-5                                                                                   |  | -7.406 |  | -6.253 |  | -5.236 |  | -8.496 |
| $\Delta E_{LP/LUMO}$                                                                     | 6.59                                                                              | 4.96   | 3.82                                                                               | 8.71   |                                                                                     |        |                                                                                     |        |
| $\Delta E_{LP/LUMO}$ (fc[(NDipp) <sub>2</sub> Si])                                       | 6.32                                                                              | 4.71   | 3.74                                                                               | 8.58   |                                                                                     |        |                                                                                     |        |
| $\Delta E_{LP/LUMO}$ ( <b>1</b> Si) – $\Delta E_{LP/LUMO}$ (fc[(NDipp) <sub>2</sub> Si]) | 0.27                                                                              | 0.25   | 0.08                                                                               | 0.14   |                                                                                     |        |                                                                                     |        |
| $E_{LUMO}$ ( <b>1</b> Si) – $E_{LUMO}$ (fc[(NDipp) <sub>2</sub> Si])                     | 0.49                                                                              | 0.46   | 0.40                                                                               | 0.48   |                                                                                     |        |                                                                                     |        |
| $E_{LP}$ ( <b>1</b> Si) – $E_{LP}$ (fc[(NDipp) <sub>2</sub> Si])                         | 0.23                                                                              | 0.21   | 0.32                                                                               | 0.35   |                                                                                     |        |                                                                                     |        |

**Table S3.** Frontier molecular orbitals of  $\text{fc}[(\text{BMe}_2)_2\text{Si}]$  calculated with PBEh-3c (H atoms not shown, energies in eV, energy surfaces with  $0.5 a_0^{-3/2}$ ). LUMO and lone pair energies are highlighted in red.

|        |                                                                                     |        |
|--------|-------------------------------------------------------------------------------------|--------|
| LUMO   | 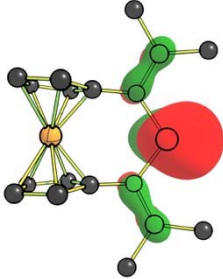   | -0.696 |
| HOMO   |    | -6.732 |
| HOMO-1 |   | -7.264 |
| HOMO-2 |  | -7.342 |
| HOMO-3 |  | -8.081 |

**Table S3** (continued)

|                      |                                                                                   |        |
|----------------------|-----------------------------------------------------------------------------------|--------|
| HOMO-4               | 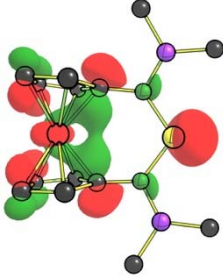 | -8.127 |
| HOMO-5               |  | -8.891 |
| $\Delta E_{LP/LUMO}$ |                                                                                   | 6.036  |

**Cartesian coordinates for the optimized structures**

**1Si:**

|    |              |              |              |
|----|--------------|--------------|--------------|
| Fe | 0.002095000  | 0.001917000  | -3.029978000 |
| Si | -0.000105000 | 0.001751000  | 0.672462000  |
| N  | -1.419526000 | 0.090573000  | -0.342996000 |
| N  | -3.092207000 | 0.970687000  | 1.448369000  |
| N  | -3.598551000 | -1.035470000 | 0.514154000  |
| N  | 1.420321000  | -0.087324000 | -0.341354000 |
| N  | 3.598326000  | 1.037033000  | 0.520680000  |
| N  | 3.091932000  | -0.972161000 | 1.448600000  |
| C  | -1.546375000 | 0.127681000  | -1.750380000 |
| C  | -1.481825000 | 1.309713000  | -2.541300000 |
| H  | -1.323474000 | 2.307459000  | -2.158399000 |
| C  | -1.608220000 | 0.938468000  | -3.902237000 |
| H  | -1.582809000 | 1.612084000  | -4.745971000 |
| C  | -1.770738000 | -0.469087000 | -3.958194000 |
| H  | -1.897157000 | -1.060627000 | -4.852708000 |
| C  | -1.738560000 | -0.972054000 | -2.634867000 |
| H  | -1.839156000 | -2.008144000 | -2.348229000 |
| C  | 1.548969000  | -0.124274000 | -1.748544000 |
| C  | 1.743132000  | 0.974896000  | -2.633389000 |
| H  | 1.845035000  | 2.011136000  | -2.347858000 |
| C  | 1.776499000  | 0.471003000  | -3.956347000 |
| H  | 1.904594000  | 1.061868000  | -4.851071000 |
| C  | 1.612625000  | -0.936353000 | -3.899831000 |
| H  | 1.587481000  | -1.610395000 | -4.743232000 |
| C  | 1.484367000  | -1.306575000 | -2.538856000 |
| H  | 1.323592000  | -2.303516000 | -2.154916000 |
| C  | -4.536705000 | -0.735858000 | 1.494193000  |
| H  | -5.351068000 | -1.404501000 | 1.721358000  |
| C  | -4.234679000 | 0.448220000  | 2.051451000  |
| H  | -4.749858000 | 0.975730000  | 2.837557000  |
| C  | -2.725649000 | 2.318568000  | 1.701483000  |
| C  | -3.171295000 | 3.316987000  | 0.816602000  |
| C  | -2.922969000 | 4.644552000  | 1.144754000  |

|   |              |              |              |
|---|--------------|--------------|--------------|
| H | -3.257536000 | 5.433726000  | 0.484857000  |
| C | -2.262250000 | 4.982291000  | 2.312890000  |
| H | -2.091464000 | 6.022378000  | 2.558655000  |
| C | -1.808738000 | 3.988192000  | 3.157113000  |
| H | -1.286027000 | 4.266119000  | 4.063508000  |
| C | -2.017100000 | 2.642044000  | 2.865567000  |
| C | -3.956060000 | 2.989143000  | -0.438072000 |
| H | -3.638615000 | 2.010662000  | -0.804953000 |
| C | -5.453648000 | 2.902064000  | -0.133694000 |
| H | -5.668578000 | 2.159702000  | 0.633344000  |
| H | -6.009531000 | 2.619737000  | -1.030391000 |
| H | -5.837098000 | 3.865067000  | 0.208933000  |
| C | -3.716315000 | 3.976176000  | -1.578674000 |
| H | -4.193228000 | 4.941531000  | -1.398863000 |
| H | -4.135519000 | 3.577591000  | -2.503150000 |
| H | -2.654378000 | 4.156786000  | -1.747773000 |
| C | -1.494229000 | 1.589683000  | 3.819081000  |
| H | -1.518162000 | 0.625806000  | 3.307214000  |
| C | -2.374360000 | 1.488781000  | 5.065486000  |
| H | -2.355890000 | 2.414172000  | 5.644444000  |
| H | -2.027164000 | 0.685717000  | 5.718206000  |
| H | -3.412509000 | 1.277165000  | 4.810800000  |
| C | -0.038867000 | 1.850238000  | 4.202974000  |
| H | 0.600307000  | 1.892065000  | 3.320230000  |
| H | 0.335663000  | 1.044672000  | 4.835967000  |
| H | 0.087427000  | 2.776967000  | 4.764609000  |
| C | -3.783167000 | -2.128310000 | -0.366470000 |
| C | -4.738002000 | -2.008576000 | -1.387850000 |
| C | -4.921727000 | -3.086212000 | -2.244805000 |
| H | -5.652372000 | -3.016853000 | -3.041099000 |
| C | -4.180797000 | -4.246646000 | -2.103007000 |
| H | -4.339980000 | -5.077350000 | -2.778527000 |
| C | -3.233007000 | -4.340123000 | -1.100302000 |
| H | -2.651050000 | -5.248986000 | -1.003199000 |
| C | -3.011174000 | -3.285535000 | -0.219327000 |
| C | -5.561074000 | -0.751687000 | -1.582578000 |
| H | -5.187685000 | 0.016148000  | -0.904053000 |
| C | -5.426888000 | -0.189719000 | -2.997122000 |
| H | -4.387763000 | 0.033142000  | -3.238547000 |
| H | -6.001147000 | 0.734878000  | -3.085882000 |
| H | -5.810084000 | -0.877833000 | -3.752787000 |
| C | -7.025873000 | -0.997168000 | -1.221644000 |
| H | -7.482013000 | -1.745777000 | -1.872447000 |
| H | -7.605292000 | -0.077173000 | -1.318689000 |
| H | -7.129662000 | -1.346461000 | -0.193797000 |
| C | -1.927581000 | -3.411656000 | 0.826945000  |
| H | -1.849485000 | -2.460358000 | 1.356175000  |
| C | -2.264644000 | -4.477526000 | 1.867519000  |
| H | -3.214158000 | -4.265999000 | 2.359483000  |
| H | -1.487778000 | -4.517393000 | 2.633542000  |
| H | -2.335254000 | -5.470005000 | 1.417818000  |
| C | -0.574139000 | -3.694882000 | 0.175513000  |
| H | -0.549828000 | -4.684961000 | -0.283707000 |
| H | 0.227304000  | -3.655597000 | 0.910563000  |
| H | -0.350942000 | -2.966834000 | -0.604742000 |
| C | 4.536353000  | 0.734353000  | 1.499928000  |
| H | 5.350670000  | 1.402249000  | 1.729467000  |
| C | 4.234251000  | -0.451430000 | 2.053509000  |
| H | 4.749153000  | -0.981270000 | 2.838226000  |
| C | 3.784086000  | 2.131380000  | -0.357957000 |
| C | 3.012451000  | 3.288711000  | -0.209751000 |
| C | 3.234943000  | 4.344376000  | -1.089313000 |

|   |              |              |              |
|---|--------------|--------------|--------------|
| H | 2.653015000  | 5.253208000  | -0.991303000 |
| C | 4.183479000  | 4.252176000  | -2.091362000 |
| H | 4.343281000  | 5.083720000  | -2.765703000 |
| C | 4.924537000  | 3.091884000  | -2.233917000 |
| H | 5.655929000  | 3.023623000  | -3.029616000 |
| C | 4.740033000  | 2.013107000  | -1.378601000 |
| C | 1.926107000  | 3.413525000  | 0.833876000  |
| H | 1.860527000  | 2.468257000  | 1.375618000  |
| C | 0.570784000  | 3.669329000  | 0.174686000  |
| H | 0.537824000  | 4.649288000  | -0.305439000 |
| H | -0.232213000 | 3.636952000  | 0.908328000  |
| H | 0.357753000  | 2.922812000  | -0.590884000 |
| C | 2.245418000  | 4.497503000  | 1.861095000  |
| H | 3.196911000  | 4.306841000  | 2.357811000  |
| H | 1.466475000  | 4.535199000  | 2.625042000  |
| H | 2.301963000  | 5.485316000  | 1.399484000  |
| C | 5.563638000  | 0.756673000  | -1.574258000 |
| H | 5.189579000  | -0.012310000 | -0.897425000 |
| C | 5.431616000  | 0.196855000  | -2.989860000 |
| H | 4.393021000  | -0.026709000 | -3.232865000 |
| H | 6.006913000  | -0.727014000 | -3.079493000 |
| H | 5.814969000  | 0.886605000  | -3.743938000 |
| C | 7.027901000  | 1.002035000  | -1.210996000 |
| H | 7.484804000  | 1.751322000  | -1.860482000 |
| H | 7.607585000  | 0.082215000  | -1.308093000 |
| H | 7.130194000  | 1.350387000  | -0.182682000 |
| C | 2.725497000  | -2.320821000 | 1.698065000  |
| C | 2.016288000  | -2.647470000 | 2.860896000  |
| C | 1.809202000  | -3.994438000 | 3.149616000  |
| H | 1.286331000  | -4.274763000 | 4.055165000  |
| C | 2.264145000  | -4.986357000 | 2.303626000  |
| H | 2.094259000  | -6.027112000 | 2.547169000  |
| C | 2.924905000  | -4.645526000 | 1.136438000  |
| H | 3.260554000  | -5.432959000 | 0.475001000  |
| C | 3.172373000  | -3.317053000 | 0.811314000  |
| C | 1.491668000  | -1.597667000 | 3.816291000  |
| H | 1.515207000  | -0.632471000 | 3.306896000  |
| C | 0.036080000  | -1.860275000 | 4.197860000  |
| H | -0.602327000 | -1.897657000 | 3.314359000  |
| H | -0.339079000 | -1.058192000 | 4.834867000  |
| H | -0.090786000 | -2.790116000 | 4.754180000  |
| C | 2.370428000  | -1.498912000 | 5.063806000  |
| H | 2.352883000  | -2.425789000 | 5.640429000  |
| H | 2.021424000  | -0.698106000 | 5.718347000  |
| H | 3.408503000  | -1.285023000 | 4.810688000  |
| C | 3.958605000  | -2.986208000 | -0.441615000 |
| H | 3.642456000  | -2.006423000 | -0.806103000 |
| C | 5.455910000  | -2.901485000 | -0.135169000 |
| H | 5.670571000  | -2.161663000 | 0.634394000  |
| H | 6.013233000  | -2.617084000 | -1.030313000 |
| H | 5.837959000  | -3.865877000 | 0.205110000  |
| C | 3.719325000  | -3.969783000 | -1.585290000 |
| H | 4.195338000  | -4.936024000 | -1.407842000 |
| H | 4.139773000  | -3.568841000 | -2.508177000 |
| H | 2.657441000  | -4.149100000 | -1.756026000 |
| B | -2.638203000 | 0.027859000  | 0.464640000  |
| B | 2.638180000  | -0.026322000 | 0.467644000  |

**Fc[(NDipp)<sub>2</sub>Si]:**

|   |             |              |             |
|---|-------------|--------------|-------------|
| C | 1.524527000 | -0.671768000 | 1.059342000 |
| C | 2.015347000 | 0.051291000  | 2.183598000 |

|   |              |              |              |
|---|--------------|--------------|--------------|
| H | 2.387200000  | 1.065143000  | 2.167301000  |
| C | 1.912194000  | -0.784536000 | 3.320762000  |
| H | 2.193300000  | -0.518696000 | 4.328621000  |
| C | 1.368346000  | -2.026490000 | 2.908581000  |
| H | 1.165455000  | -2.873762000 | 3.546378000  |
| C | 1.146970000  | -1.967027000 | 1.510618000  |
| H | 0.733661000  | -2.751673000 | 0.892380000  |
| C | -1.443147000 | 0.056309000  | 1.247314000  |
| C | -1.048386000 | 1.155353000  | 2.062660000  |
| H | -0.663981000 | 2.101005000  | 1.707719000  |
| C | -1.206355000 | 0.776829000  | 3.418044000  |
| H | -0.972131000 | 1.386342000  | 4.277923000  |
| C | -1.733125000 | -0.537514000 | 3.448465000  |
| H | -1.969131000 | -1.106189000 | 4.335459000  |
| C | -1.886723000 | -0.982863000 | 2.115446000  |
| H | -2.256839000 | -1.949931000 | 1.809920000  |
| C | 2.619766000  | 0.256722000  | -0.859323000 |
| C | 3.521828000  | -0.688717000 | -1.371479000 |
| C | 4.701189000  | -0.235222000 | -1.948998000 |
| H | 5.412257000  | -0.950196000 | -2.344300000 |
| C | 4.979526000  | 1.116896000  | -2.041354000 |
| H | 5.899032000  | 1.451344000  | -2.503750000 |
| C | 4.077892000  | 2.038761000  | -1.544789000 |
| H | 4.301804000  | 3.095237000  | -1.628985000 |
| C | 2.894313000  | 1.631526000  | -0.937013000 |
| C | 3.253999000  | -2.175407000 | -1.298970000 |
| H | 2.214114000  | -2.316423000 | -1.003359000 |
| C | 3.421911000  | -2.861111000 | -2.654404000 |
| H | 4.454039000  | -2.834179000 | -3.006978000 |
| H | 2.797321000  | -2.392827000 | -3.415204000 |
| H | 3.133907000  | -3.911028000 | -2.583101000 |
| C | 4.135888000  | -2.829786000 | -0.234672000 |
| H | 3.899710000  | -3.890677000 | -0.134090000 |
| H | 3.996373000  | -2.362645000 | 0.739973000  |
| H | 5.192645000  | -2.749177000 | -0.496822000 |
| C | 1.950496000  | 2.686660000  | -0.395009000 |
| H | 1.173783000  | 2.182503000  | 0.183872000  |
| C | 2.650778000  | 3.651147000  | 0.562190000  |
| H | 3.402716000  | 4.260563000  | 0.059216000  |
| H | 3.150525000  | 3.119708000  | 1.372571000  |
| H | 1.927181000  | 4.336134000  | 1.007673000  |
| C | 1.264026000  | 3.448647000  | -1.529317000 |
| H | 0.718104000  | 2.773774000  | -2.190273000 |
| H | 1.989194000  | 3.989780000  | -2.139613000 |
| H | 0.553959000  | 4.176771000  | -1.132491000 |
| C | -2.670348000 | -0.001638000 | -0.801252000 |
| C | -3.252664000 | -1.214434000 | -1.199530000 |
| C | -4.503606000 | -1.182544000 | -1.807493000 |
| H | -4.964142000 | -2.106951000 | -2.134224000 |
| C | -5.173397000 | 0.009945000  | -2.004985000 |
| H | -6.151019000 | 0.013924000  | -2.469077000 |
| C | -4.583636000 | 1.198724000  | -1.616304000 |
| H | -5.109756000 | 2.130415000  | -1.783801000 |
| C | -3.324849000 | 1.218888000  | -1.026443000 |
| C | -2.559556000 | -2.550186000 | -1.030046000 |
| H | -1.672435000 | -2.402376000 | -0.411824000 |
| C | -2.087168000 | -3.083260000 | -2.382838000 |
| H | -1.413953000 | -2.378008000 | -2.872436000 |
| H | -2.927815000 | -3.256668000 | -3.057162000 |
| H | -1.556977000 | -4.030327000 | -2.265252000 |
| C | -3.439824000 | -3.573367000 | -0.313734000 |
| H | -2.876340000 | -4.486560000 | -0.115151000 |

|    |              |              |              |
|----|--------------|--------------|--------------|
| H  | -4.310367000 | -3.857261000 | -0.906895000 |
| H  | -3.807679000 | -3.190632000 | 0.639055000  |
| C  | -2.712288000 | 2.551634000  | -0.655585000 |
| H  | -1.680537000 | 2.379982000  | -0.346743000 |
| C  | -2.651876000 | 3.501401000  | -1.850862000 |
| H  | -3.644454000 | 3.787221000  | -2.202055000 |
| H  | -2.118745000 | 3.049753000  | -2.687596000 |
| H  | -2.129694000 | 4.419605000  | -1.576740000 |
| C  | -3.449779000 | 3.188367000  | 0.521897000  |
| H  | -2.960999000 | 4.115743000  | 0.826384000  |
| H  | -3.473002000 | 2.520615000  | 1.382930000  |
| H  | -4.481199000 | 3.429977000  | 0.258457000  |
| N  | 1.397589000  | -0.179812000 | -0.255629000 |
| N  | -1.385039000 | -0.008810000 | -0.163418000 |
| Fe | 0.068263000  | -0.504515000 | 2.423359000  |
| Si | -0.025264000 | -0.002352000 | -1.269896000 |

**fc[(NBMe<sub>2</sub>)<sub>2</sub>Si]:**

|    |              |              |              |
|----|--------------|--------------|--------------|
| Fe | -0.000023000 | -1.564234000 | -0.040498000 |
| Si | -0.000172000 | 2.160685000  | -0.114283000 |
| N  | -1.443806000 | 1.130860000  | -0.059819000 |
| N  | 1.443644000  | 1.131044000  | -0.059866000 |
| C  | -1.527319000 | -0.282580000 | -0.045748000 |
| C  | -1.617376000 | -1.122349000 | -1.189398000 |
| H  | -1.588001000 | -0.788250000 | -2.216677000 |
| C  | -1.716073000 | -2.462559000 | -0.740887000 |
| H  | -1.779906000 | -3.337486000 | -1.370726000 |
| C  | -1.713106000 | -2.453684000 | 0.676514000  |
| H  | -1.773713000 | -3.320818000 | 1.317348000  |
| C  | -1.611136000 | -1.108098000 | 1.108255000  |
| H  | -1.575551000 | -0.762566000 | 2.131572000  |
| C  | 1.527161000  | -0.282394000 | -0.047115000 |
| C  | 1.615102000  | -1.120942000 | -1.191797000 |
| H  | 1.583836000  | -0.785801000 | -2.218686000 |
| C  | 1.714761000  | -2.461629000 | -0.744909000 |
| H  | 1.777433000  | -3.335864000 | -1.375826000 |
| C  | 1.714509000  | -2.454253000 | 0.672502000  |
| H  | 1.776427000  | -3.322077000 | 1.312273000  |
| C  | 1.613232000  | -1.109138000 | 1.105860000  |
| H  | 1.579510000  | -0.764643000 | 2.129580000  |
| B  | -2.718813000 | 1.817546000  | -0.003741000 |
| B  | 2.718444000  | 1.817690000  | -0.001628000 |
| C  | -2.882531000 | 3.389414000  | -0.035861000 |
| H  | -3.317125000 | 3.704911000  | 0.918418000  |
| H  | -2.006180000 | 4.007706000  | -0.213300000 |
| H  | -3.635405000 | 3.645542000  | -0.786650000 |
| C  | -4.049422000 | 0.969660000  | 0.122412000  |
| H  | -4.939702000 | 1.598886000  | 0.118363000  |
| H  | -4.155104000 | 0.238241000  | -0.682760000 |
| H  | -4.067263000 | 0.382228000  | 1.044240000  |
| C  | 4.048956000  | 0.970130000  | 0.127975000  |
| H  | 4.939244000  | 1.599325000  | 0.121013000  |
| H  | 4.066632000  | 0.387716000  | 1.053018000  |
| H  | 4.154758000  | 0.234445000  | -0.673253000 |
| C  | 2.882660000  | 3.389400000  | -0.037304000 |
| H  | 3.328127000  | 3.707349000  | 0.911020000  |
| H  | 3.628072000  | 3.642029000  | -0.796887000 |
| H  | 2.005421000  | 4.008227000  | -0.208175000 |



## C – References

- S1 F. Neese, *Wiley Interdisciplinary Reviews: Computational Molecular Science*, 2022, **12**, 1–15.
- S2 S. Grimme, J. G. Brandenburg, C. Bannwarth and A. Hansen, *J. Chem. Phys.*, 2015, **143**, 0–19.
- S3 M. J. Frisch, G. W. Trucks, H. B. Schlegel, G. E. Scuseria, M. A. Robb, J. R. Cheeseman, G. Scalmani, V. Barone, G. A. Petersson, H. Nakatsuji, X. Li, M. Caricato, A. Marenich, J. Bloino, B. G. Janesko, R. Gomperts, B. Mennucci, H. P. Hratchian, J. V. Ortiz, A. F. Izmaylov, J. L. Sonnenberg, D. Williams-Young, F. Ding, F. Lipparini, F. Egidi, J. Goings, B. Peng, A. Petrone, T. Henderson, D. Ranasinghe, V. G. Zakrzewski, J. Gao, N. Rega, G. Zheng, W. Liang, M. Hada, M. Ehara, K. Toyota, R. Fukuda, J. Hasegawa, M. Ishida, T. Nakajima, Y. Honda, O. Kitao, H. Nakai, T. Vreven, K. Throssell, J. A. J. Montgomery, J. E. Peralta, F. Ogliaro, M. Bearpark, J. J. Heyd, E. Brothers, K. N. Kudin, V. N. Staroverov, T. Keith, R. Kobayashi, J. Normand, K. Raghavachari, A. Rendell, J. C. Burant, S. S. Iyengar, J. Tomasi, M. Cossi, J. M. Millam, M. Klene, C. Adamo, R. Cammi, J. W. Ochterski, R. L. Martin, K. Morokuma, O. Farkas, J. B. Foresman and D. J. Fox, *Gaussian*, Gaussian, Inc., Wallington CT, 2009.
- S4 A. D. Becke, *J. Chem. Phys.*, 1993, **98**, 5648–5652.
- S5 Y. Zhao and D. G. Truhlar, *J. Chem. Phys.*, 2006, **125**, 194101.
- S6 J.-D. Chai and M. Head-Gordon, *Phys. Chem. Chem. Phys.*, 2008, **10**, 6615.
- S7 F. Weigend and R. Ahlrichs, *Phys. Chem. Chem. Phys.*, 2005, **7**, 3297–305.
- S8 S. Grimme, J. Antony, S. Ehrlich and H. Krieg, *J. Chem. Phys.*, 2010, **132**, 1.
- S9 G. A. Andrienko, *Chemcraft - graphical software for visualization of quantum chemistry computations. Version 1.8, build 654.*, Chemcraft, 2015.
- S10 N. Weyer, M. Heinz, J. I. Schweizer, C. Bruhn, M. C. Holthausen and U. Siemeling, *Angew. Chem. Int. Ed.*, 2021, **60**, 2624–2628. Note that we have obtained slightly different energy values due to our use of the newer ORCA version 5.0.3.
